# Supplementary material for: Genetic interactions between ANLN and KDR are prognostic for breast cancer survival
Source: PubMed Central journal article supplement — Oncol Rep. 2019 Sep 24;42(6):2255–66. doi: 10.3892/or.2019.7332 (PMC6826306; doi:10.3892/or.2019.7332), 2019-09-24
Supplement: Supplementary_Data.pdf [file Supplementary_Data.pdf]

Figure S1. Kaplan-Meier plots showing the prognostic values of *ANLN* and *KDR* in different sample cohorts. Kaplan-Meier plots show the prognostic value of *ANLN* in (A) all breast cancer samples, (B) ER-HER2<sup>-</sup> breast cancer samples and (C) ER<sup>+</sup>HER2<sup>+</sup> breast cancer samples. Kaplan-Meier plots show the prognostic value of *KDR* in (D) all breast cancer samples, (E) ER-HER2<sup>-</sup> breast cancer samples and (F) ER<sup>+</sup>HER2<sup>+</sup> breast cancer samples. Kaplan-Meier plots were computed using the online tool Kaplan-Meier Plotter (62). *ANLN*, anillin actin-binding protein; *KDR*, kinase insert domain receptor; ER, estrogen receptor; HER2, human epidermal growth factor receptor 2.

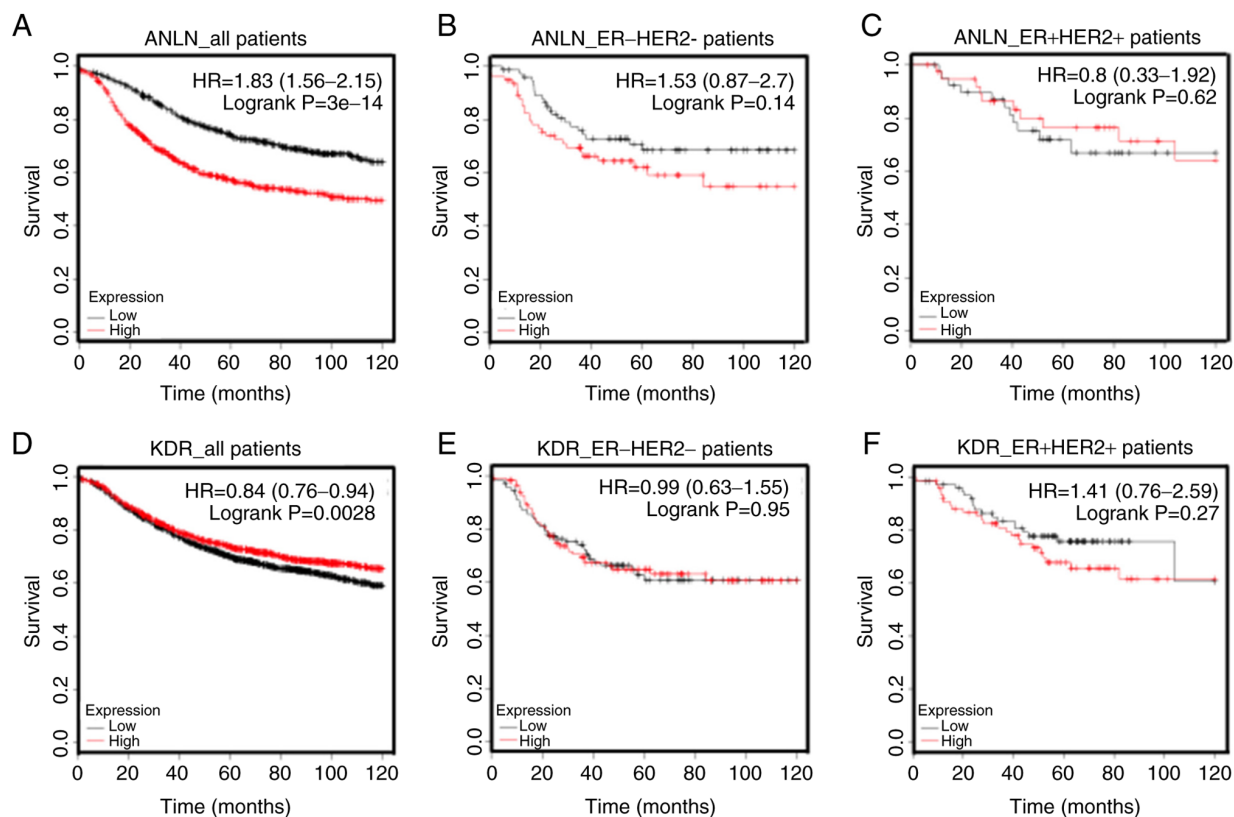

Table SI. sgRNAs designed for regulating *ANLN* and *KDR*.

| Gene        | Direction  | sgRNA target sequence              | Genomic location in coding sequence |
|-------------|------------|------------------------------------|-------------------------------------|
| <i>ANLN</i> | Activation | 5'-<br>CCACCCCGCGGCGAGGG<br>CTG-3' | 326 bp upstream of start<br>codon   |
| <i>KDR</i>  | Activation | 5'-<br>GCCTCCGCGCTCTAGAG<br>TTT-3' | 324 bp upstream of start<br>codon   |
| <i>KDR</i>  | Repression | 5'-<br>TGTGGCTCTGCGTGGAG<br>ACC-3' | 29 bp downstream of start<br>codon  |
| <i>ANLN</i> | Repression | 5'-<br>GAAGATTCTCTCGCCTG<br>GCA-3' | 38 bp downstream of start<br>codon  |

*ANLN*, anillin actin-binding protein; *KDR*, kinase insert domain receptor.

Table SII. Primers used in reverse transcription-quantitative PCR.

| Gene         | Forward primer (5'-3') | Reverse primer(5'-3') |
|--------------|------------------------|-----------------------|
| <i>ANLN</i>  | TGTTCTGGACAAGGTCCCCT   | ACACCATCTTCGATGCCAGG  |
| <i>KDR</i>   | ATGCATCCTTGCAGGACCAA   | GGTTTCCTGTGATCGTGGGT  |
| <i>GAPDH</i> | CCCACTCCTCCACCTTTGAC   | ATGAGGTCCACCACCCTGTT  |

*ANLN*, anillin actin-binding protein; *KDR*, kinase insert domain receptor.

Table SIII. KEGG annotations of genes with expression quantitatively associated with the four identified disease-associated single nucleotide polymorphisms.

| ENTREZ ID | Gene symbol | Gene name                                              | KEGG pathway                                          |
|-----------|-------------|--------------------------------------------------------|-------------------------------------------------------|
| 100       | ADA         | Adenosine deaminase                                    | hsa00230;hsa01100;hsa05340                            |
| 10010     | TANK        | TRAF family member associated NF- $\kappa$ B activator | hsa04621;hsa04622                                     |
| 10038     | PARP2       | Poly(ADP-ribose) polymerase 2                          | hsa03410;hsa04210;hsa04217                            |
| 10197     | PSME3       | Proteasome activator subunit 3                         | hsa03050;hsa04612;hsa05160                            |
| 10235     | RASGRP2     | RAS guanyl releasing protein 2                         | hsa04010;hsa04014;hsa04015;hsa04062;hsa04611;hsa05200 |
| 10241     | CALCOCO2    | Calcium binding and coiled-coil domain 2               | hsa04137                                              |
| 10248     | POP7        | POP7 homolog, ribonuclease P/MRP subunit               | hsa03008;hsa03013                                     |
| 10332     | CLEC4M      | C-type lectin domain family 4 member M                 | hsa04145;hsa04625;hsa05152;hsa05162                   |
| 10347     | ABCA7       | ATP binding cassette subfamily A member 7              | hsa02010                                              |
| 10382     | TUBB4A      | Tubulin $\beta$ 4A class IVa                           | hsa04145;hsa04540;hsa05130                            |
| 10419     | PRMT5       | Protein arginine methyltransferase 5                   | hsa03013                                              |
| 10507     | SEMA4D      | Semaphorin 4D                                          | hsa04360                                              |
| 10535     | RNASEH2A    | Ribonuclease H2 subunit A                              | hsa03030                                              |
| 10544     | PROCR       | Protein C receptor                                     | hsa04610                                              |
| 10557     | RPP38       | Ribonuclease P/MRP subunit p38                         | hsa03008;hsa03013                                     |
| 10572     | SIVA1       | SIVA1 apoptosis inducing factor                        | hsa04115                                              |

|        |           |                                                  |                                              |
|--------|-----------|--------------------------------------------------|----------------------------------------------|
| 10603  | SH2B2     | SH2B adaptor protein 2                           | hsa04722;hsa04910                            |
| 10621  | POLR3F    | RNA polymerase III subunit F                     | hsa00230;hsa00240;hsa01100;hsa03020;hsa04623 |
| 10622  | POLR3G    | RNA polymerase III subunit G                     | hsa00230;hsa00240;hsa01100;hsa03020;hsa04623 |
| 1071   | CETP      | Cholesteryl ester transfer protein               | hsa04979                                     |
| 1075   | CTSC      | Cathepsin C                                      | hsa04142;hsa04210                            |
| 10758  | TRAF3IP2  | TRAF3 interacting protein 2                      | hsa04218;hsa04657                            |
| 10898  | CPSF4     | Cleavage and polyadenylation specific factor 4   | hsa03015;hsa05164                            |
| 10929  | SRSF8     | Serine and arginine-rich splicing factor 8       | hsa03040;hsa05168                            |
| 10948  | STARD3    | Star related lipid transfer domain-containing 3  | hsa04979                                     |
| 10960  | LMAN2     | Lectin, mannose-binding 2                        | hsa04141                                     |
| 11019  | LIAS      | Lipoic acid synthetase                           | hsa00785;hsa01100                            |
| 11200  | CHEK2     | Checkpoint kinase 2                              | hsa04110;hsa04115;hsa04218;hsa05166          |
| 11222  | MRPL3     | Mitochondrial ribosomal protein L3               | hsa03010                                     |
| 114548 | NLRP3     | NLR family pyrin domain-containing 3             | hsa04217;hsa04621;hsa04625;hsa05133;hsa05164 |
| 114879 | OSBPL5    | Oxysterol-binding protein like 5                 | hsa04979                                     |
| 115650 | TNFRSF13C | TNF receptor superfamily member 13C              | hsa04060;hsa04064;hsa04672;hsa05166;hsa05340 |
| 117    | ADCYAP1R1 | ADCYAP receptor type I 1                         | hsa04024;hsa04080;hsa04713;hsa04911;hsa04924 |
| 118672 | PSTK      | Phosphoseryl-tRNA kinase                         | hsa00450;hsa00970                            |
| 119765 | OR4B1     | Olfactory receptor family 4 subfamily B member 1 | hsa04740                                     |

|        |        |                                                |                                                                                                                                                                                                                                           |
|--------|--------|------------------------------------------------|-------------------------------------------------------------------------------------------------------------------------------------------------------------------------------------------------------------------------------------------|
| 1208   | CLPS   | Colipase                                       | hsa04975                                                                                                                                                                                                                                  |
| 1215   | CMA1   | Chymase 1                                      | hsa04614                                                                                                                                                                                                                                  |
| 124540 | MSI2   | Musashi RNA-binding protein<br>2               | hsa03015                                                                                                                                                                                                                                  |
| 1269   | CNR2   | Cannabinoid receptor 2                         | hsa04080                                                                                                                                                                                                                                  |
| 127281 | PRXL2B | Peroxiredoxin like 2B                          | hsa00590;hsa01100                                                                                                                                                                                                                         |
| 1297   | COL9A1 | Collagen type IX $\alpha$ 1 chain              | hsa04151;hsa04510;hsa04512;hsa04974;hsa05165                                                                                                                                                                                              |
| 1387   | CREBBP | CREB-binding protein                           | hsa04024;hsa04066;hsa04068;hsa04110;hsa04310;hsa04330;hsa04350;hsa04520;hsa04630;hsa04720;hsa04916;hsa04919;hsa04922;hsa05016;hsa05152;hsa05161;hsa05164;hsa05165;hsa05166;hsa05167;hsa05168;hsa05200;hsa05203;hsa05206;hsa05211;hsa05215 |
| 1388   | ATF6B  | Activating transcription factor<br>$6\beta$    | hsa04022;hsa04141;hsa04151;hsa04211;hsa04261;hsa04668;hsa04728;hsa04911;hsa04915;hsa04918;hsa04925;hsa04926;hsa04927;hsa04928;hsa04934;hsa05030;hsa05031;hsa05034;hsa05161;hsa05163;hsa05166;hsa05203                                     |
| 140    | ADORA3 | Adenosine A3 receptor                          | hsa04022;hsa04071;hsa04080                                                                                                                                                                                                                |
| 140838 | NANP   | N-acetylneuraminic acid<br>phosphatase         | hsa00520;hsa01100                                                                                                                                                                                                                         |
| 1410   | CRYAB  | Crystallin alpha B                             | hsa04141;hsa04213                                                                                                                                                                                                                         |
| 143    | PARP4  | Poly(ADP-ribose) polymerase<br>family member 4 | hsa03410;hsa04210;hsa04217                                                                                                                                                                                                                |
| 143471 | PSMA8  | Proteasome subunit $\alpha$ 8                  | hsa03050                                                                                                                                                                                                                                  |
| 146    | ADRA1D | Adrenoceptor $\alpha$ 1D                       | hsa04020;hsa04022;hsa04080;hsa04261;hsa04270;hsa04970                                                                                                                                                                                     |

|        |          |                                                  |                                                                                                                                                                                                       |
|--------|----------|--------------------------------------------------|-------------------------------------------------------------------------------------------------------------------------------------------------------------------------------------------------------|
| 1479   | CSTF3    | Cleavage stimulation factor subunit 3            | hsa03015                                                                                                                                                                                              |
| 1500   | CTNND1   | Catenin $\delta$ 1                               | hsa04015;hsa04520;hsa04670                                                                                                                                                                            |
| 1503   | CTPS1    | CTP synthase 1                                   | hsa00240;hsa01100                                                                                                                                                                                     |
| 1511   | CTSG     | Cathepsin G                                      | hsa04080;hsa04142;hsa04614;hsa05146;hsa05322                                                                                                                                                          |
| 155066 | ATP6V0E2 | ATPase H <sup>+</sup> transporting V0 subunit e2 | hsa00190;hsa01100;hsa04145;hsa04721;hsa04966;hsa05110;hsa05120;hsa05165;hsa05323                                                                                                                      |
| 160287 | LDHAL6A  | Lactate dehydrogenase A like 6A                  | hsa00010;hsa00270;hsa00620;hsa00640;hsa01100;hsa04922                                                                                                                                                 |
| 1610   | DAO      | D-amino acid oxidase                             | hsa00260;hsa00330;hsa00472;hsa01100;hsa04146                                                                                                                                                          |
| 1633   | DCK      | Deoxycytidine kinase                             | hsa00230;hsa00240;hsa01100                                                                                                                                                                            |
| 1647   | GADD45A  | Growth arrest and DNA damage inducible $\alpha$  | hsa04010;hsa04068;hsa04110;hsa04115;hsa04210;hsa04218;hsa05169;hsa05200;hsa05202;hsa05210;hsa05212;hsa05213;hsa05214;hsa05216;hsa05217;hsa05218;hsa05220;hsa05222;hsa05223;hsa05224;hsa05225;hsa05226 |
| 1654   | DDX3X    | DEAD-box helicase 3 X-linked                     | hsa04622;hsa05161;hsa05203                                                                                                                                                                            |
| 166336 | PRICKLE2 | Prickle planar cell polarity protein 2           | hsa04310                                                                                                                                                                                              |
| 1665   | DHX15    | DEAH-box helicase 15                             | hsa03040                                                                                                                                                                                              |
| 171558 | PTCRA    | Pre T cell antigen receptor $\alpha$             | hsa04330;hsa05202                                                                                                                                                                                     |
| 1717   | DHCR7    | 7-dehydrocholesterol reductase                   | hsa00100;hsa01100                                                                                                                                                                                     |
| 1730   | DIAPH2   | Diaphanous-related formin 2                      | hsa04810                                                                                                                                                                                              |
| 1736   | DKC1     | Dyskerin pseudouridine synthase 1                | hsa03008                                                                                                                                                                                              |

|        |         |                                                           |                                                                                           |
|--------|---------|-----------------------------------------------------------|-------------------------------------------------------------------------------------------|
| 1812   | DRD1    | Dopamine receptor D1                                      | hsa04020;hsa04024;hsa04080;hsa04540;hsa04728;hsa05012;hsa05030;hsa05031;hsa05032;hsa05034 |
| 1852   | DUSP9   | Dual specificity phosphatase 9                            | hsa04010;hsa04550                                                                         |
| 1903   | S1PR3   | Sphingosine-1-phosphate receptor 3                        | hsa04071;hsa04080                                                                         |
| 191    | AHCY    | Adenosylhomocysteinase                                    | hsa00270;hsa01100                                                                         |
| 1948   | EFNB2   | Ephrin B2                                                 | hsa04360                                                                                  |
| 1982   | EIF4G2  | Eukaryotic translation initiation factor 4 $\gamma$ 2     | hsa03013;hsa05416                                                                         |
| 1994   | ELAVL1  | ELAV-like RNA-binding protein 1                           | hsa04152;hsa04657                                                                         |
| 2006   | ELN     | Elastin                                                   | hsa04974                                                                                  |
| 2010   | EMD     | Emerin                                                    | hsa05410;hsa05412;hsa05414                                                                |
| 204    | AK2     | Adenylate kinase 2                                        | hsa00230;hsa00730;hsa01100                                                                |
| 204962 | SLC44A5 | Solute carrier family 44 member 5                         | hsa05231                                                                                  |
| 2060   | EPS15   | Epidermal growth factor receptor pathway substrate 15     | hsa04144                                                                                  |
| 2066   | ERBB4   | Erb-b2 receptor tyrosine kinase 4                         | hsa04010;hsa04012;hsa04020;hsa04151;hsa05205                                              |
| 2132   | EXT2    | Exostosin glycosyltransferase 2                           | hsa00534;hsa01100                                                                         |
| 2145   | EZH1    | Enhancer of zeste 1 polycomb repressive complex 2 subunit | hsa00310                                                                                  |
| 2176   | FANCC   | FA complementation group C                                | hsa03460                                                                                  |
| 2208   | FCER2   | Fc fragment of IgE receptor II                            | hsa04640;hsa05169                                                                         |
| 221178 | SPATA13 | Spermatogenesis-associated 13                             | hsa04810                                                                                  |
| 221830 | TWISTNB | TWIST neighbor                                            | hsa00230;hsa00240;hsa01100;hsa03020                                                       |
| 2237   | FEN1    | Flap structure-specific                                   | hsa03030;hsa03410;hsa03450                                                                |



|       |         |                                                                  |                                                                                                                                        |
|-------|---------|------------------------------------------------------------------|----------------------------------------------------------------------------------------------------------------------------------------|
|       |         | endonuclease 1                                                   |                                                                                                                                        |
| 2243  | FGA     | Fibrinogen $\alpha$ chain                                        | hsa04610;hsa04611                                                                                                                      |
| 2244  | FGB     | Fibrinogen $\beta$ chain                                         | hsa04610;hsa04611                                                                                                                      |
| 2260  | FGFR1   | Fibroblast growth factor receptor 1                              | hsa04010;hsa04014;hsa04015;hsa04151;hsa04520;hsa04550;hsa04714;hsa04810;hsa04928;hsa05200;hsa05205;hsa05215;hsa05218;hsa05224;hsa05230 |
| 2266  | FGG     | Fibrinogen $\gamma$ chain                                        | hsa04610;hsa04611;hsa05150                                                                                                             |
| 22800 | RRAS2   | RAS-related 2                                                    | hsa04010;hsa04014;hsa04024;hsa04072;hsa04137;hsa04140;hsa04218;hsa04371;hsa04625;hsa04810;hsa05205                                     |
| 22808 | MRAS    | Muscle RAS oncogene homolog                                      | hsa04010;hsa04014;hsa04015;hsa04072;hsa04137;hsa04140;hsa04218;hsa04371;hsa04625;hsa04810;hsa05205                                     |
| 22876 | INPP5F  | Inositol polyphosphate-5-phosphatase F                           | hsa00562;hsa01100;hsa04070                                                                                                             |
| 22894 | DIS3    | DIS3 homolog, exosome endoribonuclease and 3'-5' exoribonuclease | hsa03018                                                                                                                               |
| 22908 | SACM1L  | SAC1-like phosphatidylinositide phosphatase                      | hsa00562;hsa01100;hsa04070                                                                                                             |
| 22985 | ACIN1   | Apoptotic chromatin condensation-inducer 1                       | hsa03013;hsa03015;hsa03040                                                                                                             |
| 23171 | GPD1L   | Glycerol-3-phosphate dehydrogenase 1 like                        | hsa00564                                                                                                                               |
| 23207 | PLEKHM2 | Pleckstrin homology and RUN domain-containing M2                 | hsa05132                                                                                                                               |
| 23451 | SF3B1   | Splicing factor 3b subunit 1                                     | hsa03040                                                                                                                               |

|        |         |                                                                          |                                                                                  |
|--------|---------|--------------------------------------------------------------------------|----------------------------------------------------------------------------------|
| 23475  | QPRT    | Quinolate<br>phosphoribosyltransferase                                   | hsa00760;hsa01100                                                                |
| 23547  | LILRA4  | Leukocyte immunoglobulin-<br>like receptor A4                            | hsa04380                                                                         |
| 23590  | PDSS1   | Decaprenyl diphosphate<br>synthase subunit 1                             | hsa00900                                                                         |
| 23708  | GSPT2   | G1 to S phase transition 2                                               | hsa03015                                                                         |
| 240    | ALOX5   | Arachidonate 5-lipoxygenase                                              | hsa00590;hsa01100;hsa04664;hsa04726;hsa04913;hsa05145                            |
| 2521   | FUS     | FUS RNA-binding protein                                                  | hsa05202                                                                         |
| 2526   | FUT4    | Fucosyltransferase 4                                                     | hsa00515;hsa00601;hsa01100                                                       |
| 2556   | GABRA3  | $\gamma$ -aminobutyric acid type A<br>receptor $\alpha$ 3 subunit        | hsa04080;hsa04723;hsa04727;hsa04742;hsa05032;hsa05033                            |
| 255967 | PAN3    | Poly(A)-specific ribonuclease<br>subunit PAN3                            | hsa03018                                                                         |
| 2568   | GABRP   | $\gamma$ -aminobutyric acid type A<br>receptor $\pi$ subunit             | hsa04080;hsa04723;hsa04727;hsa05032;hsa05033                                     |
| 25804  | LSM4    | LSM4 homolog, U6 small<br>nuclear RNA and mRNA<br>degradation-associated | hsa03018;hsa03040                                                                |
| 259292 | TAS2R46 | Taste 2 receptor member 46                                               | hsa04742                                                                         |
| 2595   | GANC    | Glucosidase $\alpha$ , neutral C                                         | hsa00052;hsa00500;hsa01100                                                       |
| 25981  | DNAH1   | Dynein axonemal heavy chain<br>1                                         | hsa05016                                                                         |
| 26281  | FGF20   | Fibroblast growth factor 20                                              | hsa04010;hsa04014;hsa04015;hsa04151;hsa04810;hsa05200;hsa05218;hsa05224;hsa05226 |
| 26285  | CLDN17  | Claudin 17                                                               | hsa04514;hsa04530;hsa04670;hsa05160                                              |
| 2650   | GCNT1   | Glucosaminyl (N-acetyl)<br>transferase 1, core 2                         | hsa00512;hsa01100                                                                |

|        |         |                                                                           |                                                                                                                                                                                     |
|--------|---------|---------------------------------------------------------------------------|-------------------------------------------------------------------------------------------------------------------------------------------------------------------------------------|
| 27068  | PPA2    | Pyrophosphatase (inorganic) 2                                             | hsa00190                                                                                                                                                                            |
| 27094  | KCNMB3  | Potassium calcium-activated channel subfamily M regulatory beta subunit 3 | hsa04022;hsa04270;hsa04911                                                                                                                                                          |
| 2712   | GK2     | Glycerol kinase 2                                                         | hsa00561;hsa01100;hsa03320                                                                                                                                                          |
| 27302  | BMP10   | Bone morphogenetic protein 10                                             | hsa04060                                                                                                                                                                            |
| 2731   | GLDC    | Glycine decarboxylase                                                     | hsa00260;hsa00630;hsa01100;hsa01200                                                                                                                                                 |
| 27334  | P2RY10  | P2Y receptor family member 10                                             | hsa04080                                                                                                                                                                            |
| 2782   | GNB1    | G protein subunit $\beta$ 1                                               | hsa04014;hsa04062;hsa04151;hsa04371;hsa04713;hsa04723;hsa04724;hsa04725;hsa04726;hsa04727;hsa04728;hsa04740;hsa04744;hsa04926;hsa05032;hsa05034;hsa05163;hsa05167;hsa05170;hsa05200 |
| 2798   | GNRHR   | Gonadotropin-releasing hormone receptor                                   | hsa04080;hsa04912                                                                                                                                                                   |
| 2829   | XCR1    | X-C motif chemokine receptor 1                                            | hsa04060;hsa04062                                                                                                                                                                   |
| 283871 | PGP     | Phosphoglycolate phosphatase                                              | hsa00630;hsa01100;hsa01200                                                                                                                                                          |
| 2862   | MLNR    | Motilin receptor                                                          | hsa04080                                                                                                                                                                            |
| 287    | ANK2    | Ankyrin 2                                                                 | hsa05205                                                                                                                                                                            |
| 2870   | GRK6    | G protein-coupled receptor kinase 6                                       | hsa04062;hsa04144;hsa05032                                                                                                                                                          |
| 2894   | GRID1   | Glutamate ionotropic receptor delta type subunit 1                        | hsa04080                                                                                                                                                                            |
| 29072  | SETD2   | SET domain-containing 2                                                   | hsa00310                                                                                                                                                                            |
| 29078  | NDUFAF4 | NADH:ubiquinone oxidoreductase complex assembly factor 4                  | hsa04714                                                                                                                                                                            |

|        |             |                                                           |                                                                                                                      |
|--------|-------------|-----------------------------------------------------------|----------------------------------------------------------------------------------------------------------------------|
| 2923   | PDIA3       | Protein disulfide isomerase family A member 3             | hsa04141;hsa04612;hsa05163;hsa05169;hsa05170                                                                         |
| 2947   | GSTM3       | Glutathione S-transferase $\mu$ 3                         | hsa00480;hsa00980;hsa00982;hsa00983;hsa01524;hsa05200;hsa05204;hsa05225;hsa05418                                     |
| 2957   | GTF2A1      | General transcription factor IIA subunit 1                | hsa03022;hsa05203                                                                                                    |
| 2984   | GUCY2C      | Guanylate cyclase 2C                                      | hsa00230                                                                                                             |
| 29929  | ALG6        | ALG6, alpha-1,3-glucosyltransferase                       | hsa00510;hsa01100                                                                                                    |
| 3015   | H2AFZ       | H2A histone family member Z                               | hsa04217;hsa05034;hsa05322                                                                                           |
| 3053   | SERPIND1    | Serpin family D member 1                                  | hsa04610                                                                                                             |
| 30815  | ST6GALNA C6 | ST6 N-acetylgalactosaminide alpha-2,6-sialyltransferase 6 | hsa00604;hsa01100                                                                                                    |
| 3082   | HGF         | Hepatocyte growth factor                                  | hsa01521;hsa04010;hsa04014;hsa04015;hsa04151;hsa04510;hsa05144;hsa05200;hsa05205;hsa05211;hsa05218;hsa05225;hsa05226 |
| 30834  | ZNRD1       | Zinc ribbon domain-containing 1                           | hsa00230;hsa00240;hsa01100;hsa03020                                                                                  |
| 30835  | CD209       | CD209 molecule                                            | hsa04145;hsa04625;hsa05152;hsa05162                                                                                  |
| 31     | ACACA       | Acetyl-coA carboxylase $\alpha$                           | hsa00061;hsa00620;hsa00640;hsa01100;hsa01212;hsa04152;hsa04910;hsa04922                                              |
| 3156   | HMGCR       | 3-hydroxy-3-methylglutaryl-coA reductase                  | hsa00900;hsa01100;hsa04152;hsa04976                                                                                  |
| 317749 | DHRS4L2     | Dehydrogenase/reductase 4 like 2                          | hsa00830;hsa01100                                                                                                    |
| 3183   | HNRNPC      | Heterogeneous nuclear ribonucleoprotein C (C1/C2)         | hsa03040                                                                                                             |

|        |         |                                                    |                                                                                                                                                 |
|--------|---------|----------------------------------------------------|-------------------------------------------------------------------------------------------------------------------------------------------------|
| 3251   | HPRT1   | Hypoxanthine phosphoribosyltransferase 1           | hsa00230;hsa00983;hsa01100                                                                                                                      |
| 326    | AIRE    | Autoimmune regulator                               | hsa04120;hsa05340                                                                                                                               |
| 328    | APEX1   | Apurinic/aprimidinic endodeoxyribonuclease 1       | hsa03410                                                                                                                                        |
| 3304   | HSPA1B  | Heat shock protein family A (Hsp70) member 1B      | hsa03040;hsa04010;hsa04141;hsa04144;hsa04213;hsa04612;hsa04915;hsa05134;hsa05145;hsa05162;hsa05164                                              |
| 337876 | CHSY3   | Chondroitin sulfate synthase 3                     | hsa00532;hsa01100                                                                                                                               |
| 3385   | ICAM3   | Intercellular adhesion molecule 3                  | hsa04514                                                                                                                                        |
| 340665 | CYP26C1 | Cytochrome P450 family 26 subfamily C member 1     | hsa00830;hsa01100                                                                                                                               |
| 3421   | IDH3G   | Isocitrate dehydrogenase 3 (NAD(+)) $\gamma$       | hsa00020;hsa01100;hsa01200;hsa01210;hsa01230                                                                                                    |
| 343169 | OR6F1   | Olfactory receptor family 6 subfamily F member 1   | hsa04740                                                                                                                                        |
| 3455   | IFNAR2  | Interferon $\alpha$ and $\beta$ receptor subunit 2 | hsa04060;hsa04151;hsa04217;hsa04380;hsa04620;hsa04621;hsa04630;hsa04650;hsa05160;hsa05162;hsa05164;hsa05165;hsa05167;hsa05168;hsa05169;hsa05200 |
| 348995 | NUP43   | Nucleoporin 43                                     | hsa03013                                                                                                                                        |
| 3561   | IL2RG   | Interleukin 2 receptor subunit $\gamma$            | hsa04060;hsa04144;hsa04151;hsa04630;hsa04658;hsa04659;hsa05162;hsa05166;hsa05200;hsa05321;hsa05340                                              |
| 3562   | IL3     | Interleukin 3                                      | hsa04060;hsa04151;hsa04210;hsa04630;hsa04640;hsa04664;hsa05200;hsa05202;hsa05221;hsa05310                                                       |
| 359    | AQP2    | Aquaporin 2                                        | hsa04962                                                                                                                                        |

|        |         |                                                       |                                                                                                                                                                                                                                  |
|--------|---------|-------------------------------------------------------|----------------------------------------------------------------------------------------------------------------------------------------------------------------------------------------------------------------------------------|
| 3597   | IL13RA1 | Interleukin 13 receptor subunit $\alpha$ 1            | hsa04060;hsa04630;hsa05200                                                                                                                                                                                                       |
| 3603   | IL16    | Interleukin 16                                        | hsa04060                                                                                                                                                                                                                         |
| 3613   | IMPA2   | Inositol monophosphatase 2                            | hsa00562;hsa01100;hsa04070                                                                                                                                                                                                       |
| 3620   | IDO1    | Indoleamine 2,3-dioxygenase 1                         | hsa00380;hsa01100;hsa05143                                                                                                                                                                                                       |
| 3706   | ITPKA   | Inositol-trisphosphate 3-kinase A                     | hsa00562;hsa01100;hsa04020;hsa04070                                                                                                                                                                                              |
| 3716   | JAK1    | Janus kinase 1                                        | hsa01521;hsa04151;hsa04217;hsa04380;hsa04550;hsa04621;hsa04630;hsa04658;hsa04659;hsa05140;hsa05145;hsa05152;hsa05160;hsa05161;hsa05162;hsa05163;hsa05164;hsa05165;hsa05166;hsa05167;hsa05168;hsa05169;hsa05200;hsa05203;hsa05212 |
| 3766   | KCNJ10  | Potassium voltage-gated channel subfamily J member 10 | hsa04971                                                                                                                                                                                                                         |
| 3767   | KCNJ11  | Potassium voltage-gated channel subfamily J member 11 | hsa04911;hsa04930                                                                                                                                                                                                                |
| 3770   | KCNJ14  | Potassium voltage-gated channel subfamily J member 14 | hsa04725;hsa04921                                                                                                                                                                                                                |
| 378884 | NHLRC1  | NHL repeat-containing E3 ubiquitin protein ligase 1   | hsa04120                                                                                                                                                                                                                         |
| 381    | ARF5    | ADP ribosylation factor 5                             | hsa04144                                                                                                                                                                                                                         |
| 3816   | KLK1    | Kallikrein 1                                          | hsa04614;hsa04961                                                                                                                                                                                                                |
| 388753 | COA6    | Cytochrome <i>c</i> oxidase assembly factor 6         | hsa04714                                                                                                                                                                                                                         |
| 390077 | OR52N2  | Olfactory receptor family 52 subfamily N member 2     | hsa04740                                                                                                                                                                                                                         |

|        |         |                                                   |                                                                                  |
|--------|---------|---------------------------------------------------|----------------------------------------------------------------------------------|
| 3916   | LAMP1   | Lysosomal-associated membrane protein 1           | hsa04140;hsa04142;hsa04145;hsa05152                                              |
| 392255 | GDF6    | Growth differentiation factor 6                   | hsa04060;hsa04350;hsa04390                                                       |
| 3925   | STMN1   | Stathmin 1                                        | hsa04010;hsa05206                                                                |
| 394    | ARHGAP5 | Rho GTPase-activating protein 5                   | hsa04510;hsa04670                                                                |
| 397    | ARHGDIB | Rho GDP dissociation inhibitor $\beta$            | hsa04722;hsa04962                                                                |
| 403239 | OR2T27  | Olfactory receptor family 2 subfamily T member 27 | hsa04740                                                                         |
| 4050   | LTB     | Lymphotoxin $\beta$                               | hsa04060;hsa04064;hsa05323                                                       |
| 4116   | MAGOH   | Mago homolog, exon junction complex subunit       | hsa03013;hsa03015;hsa03040                                                       |
| 414062 | CCL3L3  | C-C motif chemokine ligand 3 like 3               | hsa04060;hsa04062;hsa04620;hsa05132;hsa05142;hsa05163;hsa05323                   |
| 4141   | MARS    | Methionyl-tRNA synthetase                         | hsa00450;hsa00970                                                                |
| 415117 | STX19   | Syntaxin 19                                       | hsa04130                                                                         |
| 4224   | MEP1A   | Meprin A subunit $\alpha$                         | hsa04974                                                                         |
| 4257   | MGST1   | Microsomal glutathione S-transferase 1            | hsa00480;hsa00980;hsa00982;hsa00983;hsa01524;hsa05200;hsa05204;hsa05225;hsa05418 |
| 4326   | MMP17   | Matrix metalloproteinase 17                       | hsa04928                                                                         |
| 440093 | H3F3C   | H3 histone family member 3C                       | hsa05034;hsa05202;hsa05322                                                       |
| 442361 | OR2A2   | Olfactory receptor family 2 subfamily A member 2  | hsa04740                                                                         |
| 4502   | MT2A    | Metallothionein 2A                                | hsa04978                                                                         |
| 4726   | NDUFS6  | NADH:ubiquinone oxidoreductase subunit S6         | hsa00190;hsa01100;hsa04714;hsa04723;hsa04932;hsa05010;hsa05012;hsa05016          |
| 4756   | NEO1    | Neogenin 1                                        | hsa04514                                                                         |
| 4780   | NFE2L2  | Nuclear factor, erythroid 2 like                  | hsa04141;hsa05200;hsa05225;hsa0                                                  |

|       |          |                                                                   |                                                                                                                      |
|-------|----------|-------------------------------------------------------------------|----------------------------------------------------------------------------------------------------------------------|
|       |          | 2                                                                 | 5418                                                                                                                 |
| 4802  | NFYC     | Nuclear transcription factor Y subunit $\gamma$                   | hsa04612;hsa05152                                                                                                    |
| 4886  | NPY1R    | Neuropeptide Y receptor Y1                                        | hsa04024;hsa04080;hsa04923                                                                                           |
| 4889  | NPY5R    | Neuropeptide Y receptor Y5                                        | hsa04080                                                                                                             |
| 5018  | OXA1L    | OXA1L, mitochondrial inner membrane protein                       | hsa03060                                                                                                             |
| 5023  | P2RX1    | Purinergic receptor P2X 1                                         | hsa04020;hsa04080;hsa04611                                                                                           |
| 5026  | P2RX5    | Purinergic receptor P2X 5                                         | hsa04020;hsa04080                                                                                                    |
| 5050  | PAFAH1B3 | Platelet-activating factor acetylhydrolase 1b catalytic subunit 3 | hsa00565;hsa01100                                                                                                    |
| 5079  | PAX5     | Paired box 5                                                      | hsa05202                                                                                                             |
| 50835 | TAS2R9   | Taste 2 receptor member 9                                         | hsa04742                                                                                                             |
| 50838 | TAS2R13  | Taste 2 receptor member 13                                        | hsa04742                                                                                                             |
| 51013 | EXOSC1   | Exosome component 1                                               | hsa03018                                                                                                             |
| 51028 | VPS36    | Vacuolar protein-sorting 36 homolog                               | hsa04144                                                                                                             |
| 5106  | PCK2     | Phosphoenolpyruvate carboxykinase 2, mitochondrial                | hsa00010;hsa00020;hsa00620;hsa01100;hsa03320;hsa04068;hsa04151;hsa04152;hsa04910;hsa04920;hsa04922;hsa04931;hsa04964 |
| 51069 | MRPL2    | Mitochondrial ribosomal protein L2                                | hsa03010                                                                                                             |
| 51073 | MRPL4    | Mitochondrial ribosomal protein L4                                | hsa03010                                                                                                             |
| 51091 | SEPSECS  | Sep (O-phosphoserine) tRNA:Sec (selenocysteine) tRNA synthase     | hsa00450;hsa00970                                                                                                    |



|       |         |                                                           |                                                       |
|-------|---------|-----------------------------------------------------------|-------------------------------------------------------|
| 51128 | SAR1B   | Secretion-associated Ras-related GTPase 1B                | hsa04141;hsa05134                                     |
| 51363 | CHST15  | Carbohydrate sulfotransferase 15                          | hsa00532                                              |
| 51365 | PLA1A   | Phospholipase A1 member A                                 | hsa04014                                              |
| 51421 | AMOTL2  | Angiomotin-like 2                                         | hsa04530                                              |
| 51433 | ANAPC5  | Anaphase-promoting complex subunit 5                      | hsa04110;hsa04114;hsa04120;hsa04657;hsa04914;hsa05166 |
| 51434 | ANAPC7  | Anaphase-promoting complex subunit 7                      | hsa04110;hsa04114;hsa04120;hsa04914;hsa05166          |
| 5148  | PDE6G   | Phosphodiesterase 6G                                      | hsa00230;hsa04744                                     |
| 51503 | CWC15   | CWC15 spliceosome-associated protein homolog              | hsa03040                                              |
| 5152  | PDE9A   | Phosphodiesterase 9A                                      | hsa00230                                              |
| 51645 | PPIL1   | Peptidylprolyl isomerase-like 1                           | hsa03040                                              |
| 51706 | CYB5R1  | Cytochrome b5 reductase 1                                 | hsa00520                                              |
| 51729 | WBP11   | WW domain binding protein 11                              | hsa03040                                              |
| 51738 | GHRL    | Ghrelin and obestatin prepropeptide                       | hsa04024                                              |
| 5192  | PEX10   | Peroxisomal biogenesis factor 10                          | hsa04146                                              |
| 5199  | CFP     | Complement factor properdin                               | hsa05168                                              |
| 5208  | PFKFB2  | 6-phosphofructo-2-kinase/fructose-2,6-biphosphatase 2     | hsa00051;hsa04152;hsa04919                            |
| 5217  | PFN2    | Profilin 2                                                | hsa04015;hsa04810;hsa05131;hsa05132                   |
| 5305  | PIP4K2A | Phosphatidylinositol-5-phosphate 4-kinase type 2 $\alpha$ | hsa00562;hsa01100;hsa04070;hsa04810                   |
| 53342 | IL17D   | Interleukin 17D                                           | hsa04060;hsa04625;hsa04630;hsa0                       |

|       |         |                                                      |                                                                         |
|-------|---------|------------------------------------------------------|-------------------------------------------------------------------------|
|       |         |                                                      | 4657;hsa04659                                                           |
| 5409  | PNMT    | Phenylethanolamine N-methyltransferase               | hsa00350;hsa01100                                                       |
| 5411  | PNN     | Pinin, desmosome-associated protein                  | hsa03013;hsa03015                                                       |
| 5413  | 5-Sep   | Septin 5                                             | hsa05012                                                                |
| 5414  | 4-Sep   | Septin 4                                             | hsa04210;hsa04215                                                       |
| 5425  | POLD2   | DNA polymerase $\delta$ 2, accessory subunit         | hsa00230;hsa00240;hsa01100;hsa03030;hsa03410;hsa03420;hsa03430;hsa03440 |
| 5427  | POLE2   | DNA polymerase $\epsilon$ 2, accessory subunit       | hsa00230;hsa00240;hsa01100;hsa03030;hsa03410;hsa03420                   |
| 5437  | POLR2H  | RNA polymerase II subunit H                          | hsa00230;hsa00240;hsa01100;hsa03020;hsa04623;hsa05016                   |
| 5438  | POLR2I  | RNA polymerase II subunit I                          | hsa00230;hsa00240;hsa01100;hsa03020;hsa05016                            |
| 54433 | GAR1    | GAR1 ribonucleoprotein                               | hsa03008                                                                |
| 54474 | KRT20   | Keratin 20                                           | hsa04915                                                                |
| 54802 | TRIT1   | tRNA isopentenyltransferase 1                        | hsa01100                                                                |
| 55127 | HEATR1  | HEAT repeat-containing 1                             | hsa03008                                                                |
| 55168 | MRPS18A | Mitochondrial ribosomal protein S18A                 | hsa03010                                                                |
| 55193 | PBRM1   | Polybromo 1                                          | hsa05225                                                                |
| 55217 | TMLHE   | Trimethyllysine hydroxylase, $\epsilon$              | hsa00310                                                                |
| 55229 | PANK4   | Pantothenate kinase 4                                | hsa00770;hsa01100                                                       |
| 5525  | PPP2R5A | Protein phosphatase 2 regulatory subunit B' $\alpha$ | hsa03015;hsa04071;hsa04114;hsa04151;hsa04152;hsa04261;hsa04728;hsa05165 |
| 55578 | SUPT20H | SPT20 homolog, SAGA complex component                | hsa04140                                                                |
| 55593 | OTUD5   | OTU deubiquitinase 5                                 | hsa04622                                                                |

|       |         |                                                                     |                                                                                                                                                                                                                                                                                                                                                                                                                                                                                                                                                                                                                                                            |
|-------|---------|---------------------------------------------------------------------|------------------------------------------------------------------------------------------------------------------------------------------------------------------------------------------------------------------------------------------------------------------------------------------------------------------------------------------------------------------------------------------------------------------------------------------------------------------------------------------------------------------------------------------------------------------------------------------------------------------------------------------------------------|
| 55616 | ASAP3   | ArfGAP with SH3 domain,<br>ankyrin repeat and PH domain<br>3        | hsa04144;hsa04666                                                                                                                                                                                                                                                                                                                                                                                                                                                                                                                                                                                                                                          |
| 55740 | ENAH    | ENAH, actin-regulator                                               | hsa04360;hsa04810                                                                                                                                                                                                                                                                                                                                                                                                                                                                                                                                                                                                                                          |
| 55750 | AGK     | Acylglycerol kinase                                                 | hsa00561;hsa01100                                                                                                                                                                                                                                                                                                                                                                                                                                                                                                                                                                                                                                          |
| 55753 | OGDHL   | Oxoglutarate dehydrogenase-<br>like                                 | hsa00020;hsa00310;hsa00380;hsa0<br>1100;hsa01200                                                                                                                                                                                                                                                                                                                                                                                                                                                                                                                                                                                                           |
| 5577  | PRKAR2B | Protein kinase camp-dependent<br>type II regulatory subunit $\beta$ | hsa04910                                                                                                                                                                                                                                                                                                                                                                                                                                                                                                                                                                                                                                                   |
| 5579  | PRKCB   | Protein kinase C $\beta$                                            | hsa01521;hsa04010;hsa04012;hsa0<br>4014;hsa04015;hsa04020;hsa04062<br>;hsa04064;hsa04066;hsa04070;hsa0<br>4071;hsa04150;hsa04270;hsa04310<br>;hsa04370;hsa04510;hsa04540;hsa0<br>4650;hsa04662;hsa04666;hsa04670<br>;hsa04713;hsa04720;hsa04723;hsa0<br>4724;hsa04725;hsa04726;hsa04727<br>;hsa04728;hsa04730;hsa04750;hsa0<br>4911;hsa04912;hsa04916;hsa04918<br>;hsa04919;hsa04921;hsa04925;hsa0<br>4928;hsa04931;hsa04933;hsa04960<br>;hsa04961;hsa04970;hsa04971;hsa0<br>4972;hsa04973;hsa05031;hsa05032<br>;hsa05140;hsa05143;hsa05146;hsa0<br>5161;hsa05163;hsa05164;hsa05170<br>;hsa05200;hsa05205;hsa05206;hsa0<br>5214;hsa05223;hsa05225;hsa05231 |
| 55802 | DCP1A   | Decapping mRNA 1A                                                   | hsa03018                                                                                                                                                                                                                                                                                                                                                                                                                                                                                                                                                                                                                                                   |
| 5588  | PRKCQ   | Protein kinase C $\theta$                                           | hsa04064;hsa04140;hsa04270;hsa0<br>4658;hsa04659;hsa04660;hsa04750<br>;hsa04920;hsa04931;hsa05162                                                                                                                                                                                                                                                                                                                                                                                                                                                                                                                                                          |
| 56171 | DNAH7   | Dynein axonemal heavy chain<br>7                                    | hsa05016                                                                                                                                                                                                                                                                                                                                                                                                                                                                                                                                                                                                                                                   |

|       |         |                                                                    |                                                       |
|-------|---------|--------------------------------------------------------------------|-------------------------------------------------------|
| 56548 | CHST7   | Carbohydrate sulfotransferase<br>7                                 | hsa00532                                              |
| 5686  | PSMA5   | Proteasome subunit $\alpha$ 5                                      | hsa03050                                              |
| 5690  | PSMB2   | Proteasome subunit $\beta$ 2                                       | hsa03050                                              |
| 56915 | EXOSC5  | Exosome component 5                                                | hsa03018                                              |
| 5693  | PSMB5   | Proteasome subunit $\beta$ 5                                       | hsa03050                                              |
| 5709  | PSMD3   | Proteasome 26S subunit, non-TPase 3                                | hsa03050;hsa05169                                     |
| 5714  | PSMD8   | Proteasome 26S subunit, non-ATPase 8                               | hsa03050;hsa05169                                     |
| 5721  | PSME2   | Proteasome-activator subunit 2                                     | hsa03050;hsa04612                                     |
| 57216 | VANGL2  | VANGL planar cell polarity protein 2                               | hsa04310                                              |
| 5730  | PTGDS   | Prostaglandin D2 synthase                                          | hsa00590;hsa01100                                     |
| 5732  | PTGER2  | Prostaglandin E receptor 2                                         | hsa04024;hsa04080;hsa04750;hsa04924;hsa05163;hsa05200 |
| 57452 | GALNT16 | Polypeptide N-acetylgalactosaminyltransferase 16                   | hsa00512;hsa01100                                     |
| 57715 | SEMA4G  | Semaphorin 4G                                                      | hsa04360                                              |
| 57819 | LSM2    | LSM2 homolog, U6 small nuclear RNA and mRNA degradation-associated | hsa03018;hsa03040                                     |
| 5783  | PTPN13  | Protein tyrosine phosphatase, non-receptor type 13                 | hsa04210                                              |
| 5874  | RAB27B  | RAB27B, member RAS oncogene family                                 | hsa04972                                              |

|       |         |                                                |                                                                                                                                                                                                       |
|-------|---------|------------------------------------------------|-------------------------------------------------------------------------------------------------------------------------------------------------------------------------------------------------------|
| 5881  | RAC3    | Rac family small GTPase 3                      | hsa04010;hsa04014;hsa04015;hsa04024;hsa04071;hsa04310;hsa04360;hsa04370;hsa04510;hsa04520;hsa04650;hsa04662;hsa04664;hsa04810;hsa05163;hsa05170;hsa05200;hsa05210;hsa05212;hsa05231;hsa05416;hsa05418 |
| 5900  | RALGDS  | Ral guanine nucleotide dissociation stimulator | hsa04014;hsa04015;hsa04072;hsa05200;hsa05210;hsa05212;hsa05231                                                                                                                                        |
| 5901  | RAN     | RAN, member RAS oncogene family                | hsa03008;hsa03013;hsa05166                                                                                                                                                                            |
| 59067 | IL21    | Interleukin 21                                 | hsa04060;hsa04630;hsa04659;hsa05321                                                                                                                                                                   |
| 5909  | RAP1GAP | RAP1 GTPase-activating protein                 | hsa04015                                                                                                                                                                                              |
| 5971  | RELB    | RELB proto-oncogene, NF- $\kappa$ B subunit    | hsa04010;hsa04064;hsa04380;hsa04625;hsa05166;hsa05169                                                                                                                                                 |
| 5998  | RGS3    | Regulator of G protein signaling 3             | hsa04360                                                                                                                                                                                              |
| 6011  | GRK1    | G protein-coupled receptor kinase 1            | hsa04062;hsa04144;hsa04744                                                                                                                                                                            |
| 60401 | EDA2R   | Ectodysplasin A2 receptor                      | hsa04060                                                                                                                                                                                              |
| 6175  | RPLP0   | Ribosomal protein lateral stalk subunit P0     | hsa03010                                                                                                                                                                                              |
| 6184  | RPN1    | Ribophorin I                                   | hsa00510;hsa01100;hsa04141                                                                                                                                                                            |
| 6201  | RPS7    | Ribosomal protein S7                           | hsa03010                                                                                                                                                                                              |
| 6204  | RPS10   | Ribosomal protein S10                          | hsa03010                                                                                                                                                                                              |
| 6259  | RYK     | Receptor-like tyrosine kinase                  | hsa04360                                                                                                                                                                                              |
| 629   | CFB     | Complement factor B                            | hsa04610;hsa05150                                                                                                                                                                                     |
| 6301  | SARS    | Seryl-tRNA synthetase                          | hsa00970                                                                                                                                                                                              |
| 6358  | CCL14   | C-C motif chemokine ligand                     | hsa04060;hsa04062                                                                                                                                                                                     |

|       |          |                                                  |                                                                                                                                                          |
|-------|----------|--------------------------------------------------|----------------------------------------------------------------------------------------------------------------------------------------------------------|
| 6361  | CCL17    | C-C motif chemokine ligand<br>17                 | hsa04060;hsa04062;hsa04625;hsa04657                                                                                                                      |
| 6366  | CCL21    | C-C motif chemokine ligand<br>21                 | hsa04060;hsa04062;hsa04064                                                                                                                               |
| 637   | BID      | BH3-interacting domain death<br>agonist          | hsa01524;hsa04071;hsa04115;hsa04210;hsa04215;hsa04217;hsa04650;hsa04932;hsa05010;hsa05014;hsa05152;hsa05163;hsa05167;hsa05169;hsa05170;hsa05200;hsa05416 |
| 638   | BIK      | BCL2-interacting killer                          | hsa01522                                                                                                                                                 |
| 63923 | TNN      | Tenascin N                                       | hsa04151;hsa04510;hsa04512;hsa05165;hsa05206                                                                                                             |
| 64098 | PARVG    | Parvin $\gamma$                                  | hsa04510                                                                                                                                                 |
| 6428  | SRSF3    | Serine and arginine-rich<br>splicing factor 3    | hsa03040;hsa05168                                                                                                                                        |
| 64374 | SIL1     | SIL1 nucleotide exchange<br>factor               | hsa04141                                                                                                                                                 |
| 64421 | DCLRE1C  | DNA cross-link repair 1C                         | hsa03450;hsa05340                                                                                                                                        |
| 64744 | SMAP2    | Small ArfGAP2                                    | hsa04144                                                                                                                                                 |
| 64802 | NMNAT1   | Nicotinamide nucleotide<br>adenylyltransferase 1 | hsa00760;hsa01100                                                                                                                                        |
| 6494  | SIPA1    | Signal-induced proliferation-<br>associated 1    | hsa04015;hsa04670                                                                                                                                        |
| 65005 | MRPL9    | Mitochondrial ribosomal<br>protein L9            | hsa03010                                                                                                                                                 |
| 65108 | MARCKSL1 | MARCKS-like 1                                    | hsa04666;hsa05140                                                                                                                                        |
| 6513  | SLC2A1   | Solute carrier family 2 member<br>1              | hsa04066;hsa04911;hsa04919;hsa04920;hsa04922;hsa04931;hsa04976;hsa05166;hsa05200;hsa05211;hsa05230                                                       |
| 652   | BMP4     | Bone morphogenetic protein 4                     | hsa04060;hsa04350;hsa04390;hsa04550;hsa04919;hsa05200;hsa05217                                                                                           |

|        |          |                                                 |                                                                                                                                                                                                                                                                                                                                                                                                                                                                                                                                  |
|--------|----------|-------------------------------------------------|----------------------------------------------------------------------------------------------------------------------------------------------------------------------------------------------------------------------------------------------------------------------------------------------------------------------------------------------------------------------------------------------------------------------------------------------------------------------------------------------------------------------------------|
|        |          |                                                 | ;hsa05418                                                                                                                                                                                                                                                                                                                                                                                                                                                                                                                        |
| 65220  | NADK     | NAD kinase                                      | hsa00760;hsa01100                                                                                                                                                                                                                                                                                                                                                                                                                                                                                                                |
| 653604 | HIST2H3D | Histone cluster 2 H3 family member d            | hsa05034;hsa05202;hsa05322                                                                                                                                                                                                                                                                                                                                                                                                                                                                                                       |
| 6616   | SNAP25   | Synaptosome-associated protein 25               | hsa04721;hsa04911                                                                                                                                                                                                                                                                                                                                                                                                                                                                                                                |
| 6652   | SORD     | Sorbitol dehydrogenase                          | hsa00040;hsa00051;hsa01100                                                                                                                                                                                                                                                                                                                                                                                                                                                                                                       |
| 6728   | SRP19    | Signal recognition particle 19                  | hsa03060                                                                                                                                                                                                                                                                                                                                                                                                                                                                                                                         |
| 6742   | SSBP1    | Single-stranded DNA-binding protein 1           | hsa03030;hsa03430;hsa03440                                                                                                                                                                                                                                                                                                                                                                                                                                                                                                       |
| 6753   | SSTR3    | Somatostatin receptor 3                         | hsa04080                                                                                                                                                                                                                                                                                                                                                                                                                                                                                                                         |
| 6760   | SS18     | SS18, nBAF chromatin remodeling complex subunit | hsa05202                                                                                                                                                                                                                                                                                                                                                                                                                                                                                                                         |
| 6817   | SULT1A1  | Sulfotransferase family 1A member 1             | hsa05204                                                                                                                                                                                                                                                                                                                                                                                                                                                                                                                         |
| 7124   | TNF      | Tumor necrosis factor                           | hsa01523;hsa04010;hsa04060;hsa04064;hsa04071;hsa04150;hsa04210;hsa04217;hsa04350;hsa04380;hsa04612;hsa04620;hsa04621;hsa04622;hsa04625;hsa04640;hsa04650;hsa04657;hsa04660;hsa04664;hsa04668;hsa04920;hsa04930;hsa04931;hsa04932;hsa04933;hsa04940;hsa05010;hsa05014;hsa05133;hsa05134;hsa05140;hsa05142;hsa05143;hsa05144;hsa05145;hsa05146;hsa05152;hsa05160;hsa05161;hsa05163;hsa05164;hsa05165;hsa05166;hsa05168;hsa05169;hsa05170;hsa05205;hsa05310;hsa05321;hsa05322;hsa05323;hsa05330;hsa05332;hsa05410;hsa05414;hsa05418 |

|      |         |                                                                                |                                                                                                             |
|------|---------|--------------------------------------------------------------------------------|-------------------------------------------------------------------------------------------------------------|
| 7175 | TPR     | Translocated promoter region, nuclear basket protein                           | hsa03013;hsa05200;hsa05216                                                                                  |
| 7248 | TSC1    | TSC complex subunit 1                                                          | hsa04072;hsa04140;hsa04150;hsa04151;hsa04152;hsa04211;hsa04218;hsa04714;hsa04910;hsa05163;hsa05165;hsa05231 |
| 7272 | TTK     | TTK protein kinase                                                             | hsa04110                                                                                                    |
| 7311 | UBA52   | Ubiquitin A-52 residue ribosomal protein fusion product 1                      | hsa03010                                                                                                    |
| 732  | C8B     | Complement C8 $\beta$ chain                                                    | hsa04610;hsa05020;hsa05146;hsa05322                                                                         |
| 7321 | UBE2D1  | Ubiquitin-conjugating enzyme E2 D1                                             | hsa04120;hsa04141                                                                                           |
| 7390 | UROS    | Uroporphyrinogen III synthase                                                  | hsa00860;hsa01100                                                                                           |
| 7448 | VTN     | Vitronectin                                                                    | hsa04151;hsa04510;hsa04512;hsa04610;hsa05165;hsa05205                                                       |
| 7517 | XRCC3   | X-ray repair cross complementing 3                                             | hsa03440                                                                                                    |
| 7531 | YWHAE   | Tyrosine 3-monooxygenase/tryptophan 5-monooxygenase activation protein epsilon | hsa04110;hsa04114;hsa04151;hsa04390;hsa04722;hsa05203                                                       |
| 7535 | ZAP70   | $\zeta$ -chain of T cell receptor associated protein kinase 70                 | hsa04014;hsa04064;hsa04650;hsa04658;hsa04659;hsa04660;hsa05340                                              |
| 7786 | MAP3K12 | Mitogen-activated protein kinase kinase kinase 12                              | hsa04010                                                                                                    |
| 784  | CACNB3  | Calcium voltage-gated channel auxiliary subunit $\beta$ 3                      | hsa04010;hsa04260;hsa04261;hsa04921;hsa05410;hsa05412;hsa05414                                              |
| 7841 | MOGS    | Mannosyl-oligosaccharide glucosidase                                           | hsa00510;hsa01100;hsa04141                                                                                  |



|       |         |                                                  |                                                                                           |
|-------|---------|--------------------------------------------------|-------------------------------------------------------------------------------------------|
| 79017 | GGCT    | Gamma-glutamylcyclotransferase                   | hsa00480;hsa01100                                                                         |
| 79602 | ADIPOR2 | Adiponectin receptor 2                           | hsa04152;hsa04211;hsa04920;hsa04932                                                       |
| 79644 | SRD5A3  | Steroid 5 $\alpha$ -reductase 3                  | hsa00140                                                                                  |
| 79695 | GALNT12 | Polypeptide N-acetylgalactosaminyltransferase 12 | hsa00512;hsa01100                                                                         |
| 79723 | SUV39H2 | Suppressor of variegation 3-9 homolog 2          | hsa00310                                                                                  |
| 79796 | ALG9    | ALG9, $\alpha$ -1,2-mannosyltransferase          | hsa00510;hsa01100                                                                         |
| 79798 | ARMC5   | Armadillo repeat-containing 5                    | hsa04934                                                                                  |
| 79799 | UGT2A3  | UDP glucuronosyltransferase family 2 member A3   | hsa00040;hsa00053;hsa00140;hsa00830;hsa00860;hsa00980;hsa00982;hsa00983;hsa01100;hsa05204 |
| 80736 | SLC44A4 | Solute carrier family 44 member 4                | hsa05231                                                                                  |
| 81035 | COLEC12 | Collectin subfamily member 12                    | hsa04145                                                                                  |
| 8106  | PABPN1  | Poly(A)-binding protein nuclear 1                | hsa03015;hsa05164                                                                         |
| 811   | CALR    | Calreticulin                                     | hsa04141;hsa04145;hsa04612;hsa05142;hsa05163;hsa05166;hsa05169;hsa05170                   |
| 8115  | TCL1A   | T cell leukemia/lymphoma 1A                      | hsa04151                                                                                  |
| 81168 | OR8J3   | Olfactory receptor family 8 subfamily J member 3 | hsa04740                                                                                  |
| 81696 | OR5V1   | Olfactory receptor family 5 subfamily V member 1 | hsa04740                                                                                  |

|       |                |                                                                  |                                                                                                                                                                                                                                                                                                                            |
|-------|----------------|------------------------------------------------------------------|----------------------------------------------------------------------------------------------------------------------------------------------------------------------------------------------------------------------------------------------------------------------------------------------------------------------------|
| 81849 | ST6GALNA<br>C5 | ST6 N-acetylgalactosaminide<br>$\alpha$ -2,6-sialyltransferase 5 | hsa00604;hsa01100                                                                                                                                                                                                                                                                                                          |
| 8317  | CDC7           | Cell division cycle 7                                            | hsa04110                                                                                                                                                                                                                                                                                                                   |
| 83464 | APH1B          | Aph-1 homolog B, $\gamma$ -secretase<br>subunit                  | hsa04330;hsa05010                                                                                                                                                                                                                                                                                                          |
| 835   | CASP2          | Caspase 2                                                        | hsa04210                                                                                                                                                                                                                                                                                                                   |
| 836   | CASP3          | Caspase 3                                                        | hsa01524;hsa04010;hsa04115;hsa04210;hsa04215;hsa04650;hsa04657;hsa04668;hsa04726;hsa04932;hsa04933;hsa05010;hsa05012;hsa05014;hsa05016;hsa05120;hsa05133;hsa05134;hsa05145;hsa05146;hsa05152;hsa05161;hsa05163;hsa05165;hsa05167;hsa05168;hsa05169;hsa05170;hsa05200;hsa05203;hsa05205;hsa05206;hsa05210;hsa05222;hsa05416 |
| 83732 | RIOK1          | RIO kinase 1                                                     | hsa03008                                                                                                                                                                                                                                                                                                                   |
| 83756 | TAS1R3         | Taste 1 receptor member 3                                        | hsa04742;hsa04973                                                                                                                                                                                                                                                                                                          |
| 83937 | RASSF4         | Ras-association domain family<br>member 4                        | hsa04392                                                                                                                                                                                                                                                                                                                   |
| 8398  | PLA2G6         | Phospholipase A2 group VI                                        | hsa00564;hsa00565;hsa00590;hsa00591;hsa00592;hsa01100;hsa04014;hsa04270;hsa04666;hsa04750                                                                                                                                                                                                                                  |
| 84000 | TMPRSS13       | Transmembrane serine<br>protease 13                              | hsa05164                                                                                                                                                                                                                                                                                                                   |
| 8451  | CUL4A          | Cullin 4A                                                        | hsa03420;hsa04120;hsa05170                                                                                                                                                                                                                                                                                                 |
| 84769 | MPV17L2        | MPV17 mitochondrial inner<br>membrane protein-like 2             | hsa04146                                                                                                                                                                                                                                                                                                                   |
| 8487  | GEMIN2         | Gem nuclear organelle-<br>associated protein 2                   | hsa03013                                                                                                                                                                                                                                                                                                                   |
| 84876 | ORAI1          | ORAI calcium release-<br>activated calcium modulator 1           | hsa04020;hsa04024;hsa04611;hsa04924;hsa04925;hsa04927;hsa04934                                                                                                                                                                                                                                                             |

|       |         |                                                              |                                                       |
|-------|---------|--------------------------------------------------------------|-------------------------------------------------------|
|       |         |                                                              | ;hsa05340                                             |
| 84890 | ADO     | 2-aminoethanethiol<br>dioxygenase                            | hsa00430;hsa01100                                     |
| 8528  | DDO     | D-aspartate oxidase                                          | hsa00250;hsa04146                                     |
| 85414 | SLC45A3 | Solute carrier family 45<br>member 3                         | hsa05202;hsa05206                                     |
| 857   | CAV1    | Caveolin 1                                                   | hsa04144;hsa04510;hsa05100;hsa05205;hsa05416;hsa05418 |
| 859   | CAV3    | Caveolin 3                                                   | hsa04144;hsa04510;hsa05100;hsa05205;hsa05418          |
| 8625  | RFXANK  | Regulatory factor X associated<br>ankyrin-containing protein | hsa04612;hsa05152;hsa05340                            |
| 8645  | KCNK5   | Potassium two pore domain<br>channel subfamily K member 5    | hsa04742;hsa04974                                     |
| 8672  | EIF4G3  | Eukaryotic translation<br>initiation factor 4 $\gamma$ 3     | hsa03013;hsa05416                                     |
| 8714  | ABCC3   | ATP-binding cassette<br>subfamily C member 3                 | hsa01523;hsa02010;hsa04976                            |
| 8723  | SNX4    | Sorting nexin 4                                              | hsa04144                                              |
| 8833  | GMPS    | Guanine monophosphate<br>synthase                            | hsa00230;hsa00983;hsa01100                            |
| 8864  | PER2    | Period circadian regulator 2                                 | hsa04710;hsa04713;hsa05168;hsa05202;hsa05221          |
| 8898  | MTMR2   | Myotubularin-related protein 2                               | hsa00562;hsa01100;hsa04070                            |
| 90    | ACVR1   | Activin A receptor type 1                                    | hsa04060;hsa04350;hsa04550;hsa05418                   |
| 9039  | UBA3    | Ubiquitin-like modifier<br>activating enzyme 3               | hsa04120                                              |
| 9047  | SH2D2A  | SH2 domain-containing 2A                                     | hsa04370                                              |
| 9103  | FCGR2C  | Fc fragment of IgG receptor IIc<br>(gene/pseudogene)         | hsa04145;hsa04380;hsa05140;hsa05150;hsa05152          |

|       |         |                                                                      |                                                       |
|-------|---------|----------------------------------------------------------------------|-------------------------------------------------------|
| 9170  | LPAR2   | Lysophosphatidic acid receptor 2                                     | hsa04015;hsa04072;hsa04080;hsa04151;hsa04810;hsa05200 |
| 91734 | IDI2    | Isopentenyl-diphosphate $\delta$ isomerase 2                         | hsa00900;hsa01100                                     |
| 9184  | BUB3    | BUB3, mitotic checkpoint protein                                     | hsa04110;hsa05166                                     |
| 9187  | SLC24A1 | Solute carrier family 24 member 1                                    | hsa04744                                              |
| 9223  | MAGI1   | Membrane-associated guanylate kinase, WW and PDZ domain-containing 1 | hsa04015;hsa04151;hsa04530;hsa05165                   |
| 9235  | IL32    | Interleukin 32                                                       | hsa04060                                              |
| 930   | CD19    | CD19 molecule                                                        | hsa04151;hsa04640;hsa04662;hsa05169;hsa05340          |
| 93034 | NT5C1B  | 5'-nucleotidase, cytosolic IB                                        | hsa00230;hsa00240;hsa00760;hsa01100                   |
| 931   | MS4A1   | Membrane spanning 4-domains A1                                       | hsa04640                                              |
| 93183 | PIGM    | Phosphatidylinositol glycan anchor biosynthesis class M              | hsa00563;hsa01100                                     |
| 9322  | TRIP10  | Thyroid hormone receptor interactor 10                               | hsa04910                                              |
| 9365  | KL      | Klotho                                                               | hsa00040;hsa01100;hsa04211;hsa04928;hsa04961          |
| 9380  | GRHPR   | Glyoxylate and hydroxypyruvate reductase                             | hsa00260;hsa00620;hsa00630;hsa01100                   |
| 9447  | AIM2    | Absent in melanoma 2                                                 | hsa04621;hsa04623                                     |
| 945   | CD33    | CD33 molecule                                                        | hsa04640                                              |
| 9466  | IL27RA  | Interleukin 27 receptor subunit $\alpha$                             | hsa04060;hsa04630;hsa04659                            |
| 955   | ENTPD6  | Ectonucleoside triphosphate diphosphohydrolase 6 (putative)          | hsa00230;hsa00240                                     |

|      |       |                                           |                                                                                                                                                                                                                                                                                        |
|------|-------|-------------------------------------------|----------------------------------------------------------------------------------------------------------------------------------------------------------------------------------------------------------------------------------------------------------------------------------------|
| 9586 | CREB5 | cAMP responsive element-binding protein 5 | hsa04022;hsa04024;hsa04151;hsa04152;hsa04211;hsa04261;hsa04668;hsa04714;hsa04725;hsa04728;hsa04911;hsa04915;hsa04918;hsa04922;hsa04925;hsa04926;hsa04927;hsa04928;hsa04931;hsa04934;hsa04962;hsa05016;hsa05030;hsa05031;hsa05034;hsa05161;hsa05163;hsa05165;hsa05166;hsa05203;hsa05215 |
| 9630 | GNA14 | G protein subunit $\alpha$ 14             | hsa04020;hsa05142;hsa05146                                                                                                                                                                                                                                                             |
| 971  | CD72  | CD72 molecule                             | hsa04662                                                                                                                                                                                                                                                                               |
| 974  | CD79B | CD79b molecule                            | hsa04662                                                                                                                                                                                                                                                                               |
| 9807 | IP6K1 | Inositol hexakisphosphate kinase 1        | hsa04070                                                                                                                                                                                                                                                                               |
| 9862 | MED24 | Mediator complex subunit 24               | hsa04919                                                                                                                                                                                                                                                                               |
| 9902 | MRC2  | Mannose receptor C type 2                 | hsa04145;hsa05152                                                                                                                                                                                                                                                                      |
| 9939 | RBM8A | RNA-binding motif protein 8A              | hsa03013;hsa03015;hsa03040                                                                                                                                                                                                                                                             |

---

KEGG, Kyoto Encyclopedia of Genes and Genomes.

Table SIV. Correlation scores and P-values from quantitative expression trait loci analysis.

| <b>SNP</b> | <b>Genes</b> | <b>Adjusted P-value</b> | <b>Correlation score</b> |
|------------|--------------|-------------------------|--------------------------|
| rs11941492 | REG3G        | 0.0057                  | 0.82                     |
| rs11941492 | VCX2         | 0.0001                  | 0.59                     |
| rs12535394 | MAP10        | 0.0010                  | 0.55                     |
| rs11133360 | TCF23        | 0.0123                  | -0.39                    |
| rs12535394 | CEACAM8      | 0.0108                  | 0.37                     |
| rs11941492 | MUSK         | 0.0088                  | 0.36                     |
| rs11941492 | DSCAM        | 0.0063                  | 0.34                     |
| rs10275489 | FAM132A      | 0.0015                  | 0.31                     |
| rs11133360 | GK2          | 0.0054                  | 0.30                     |
| rs10275489 | CDH8         | 0.0102                  | 0.28                     |
| rs12535394 | CCDC17       | 0.0046                  | 0.27                     |
| rs12535394 | COL9A1       | 0.0094                  | 0.27                     |
| rs10275489 | NOX3         | 0.0023                  | 0.24                     |
| rs11133360 | PLK5         | 0.0116                  | -0.23                    |
| rs12535394 | TWISTNB      | 0.0121                  | 0.22                     |
| rs11941492 | NOTO         | 0.0047                  | 0.22                     |
| rs12535394 | TMEM190      | 0.0105                  | 0.21                     |
| rs12535394 | EMILIN1      | 0.0123                  | -0.20                    |
| rs11133360 | C14ORF80     | 0.0014                  | 0.20                     |
| rs10275489 | BLID         | 0.0085                  | 0.19                     |
| rs11941492 | CHST7        | 0.0104                  | 0.19                     |
| rs11133360 | CCL3L3       | 0.0067                  | -0.19                    |
| rs11941492 | SSX9         | 0.0102                  | 0.18                     |
| rs10275489 | MCF2         | 0.0119                  | -0.18                    |
| rs12535394 | LCNL1        | 0.0068                  | 0.18                     |
| rs11133360 | PRSS45       | 0.0019                  | -0.18                    |
| rs12535394 | AACSP1       | 0.0103                  | 0.17                     |
| rs11133360 | SLC5A8       | 0.0072                  | 0.17                     |
| rs10275489 | KLK1         | 0.0067                  | -0.17                    |
| rs10275489 | OR8J3        | 0.0021                  | 0.17                     |
| rs11941492 | LINC00924    | 0.0060                  | 0.17                     |
| rs11941492 | OR5V1        | 0.0001                  | 0.16                     |
| rs10275489 | MYO1A        | 0.0045                  | -0.16                    |
| rs12535394 | C17ORF49     | 0.0016                  | 0.16                     |
| rs11133360 | PTMS         | 0.0000                  | 0.16                     |
| rs11133360 | MZT2A        | 0.0055                  | 0.15                     |
| rs11941492 | PM20D1       | 0.0002                  | 0.15                     |
| rs10275489 | DCAF12L2     | 0.0000                  | 0.15                     |
| rs12535394 | RLTPR        | 0.0005                  | 0.15                     |
| rs11941492 | RHOXF1       | 0.0093                  | 0.15                     |
| rs11133360 | DSC1         | 0.0067                  | -0.15                    |
| rs10275489 | DACH2        | 0.0104                  | 0.15                     |
| rs12535394 | PRSS53       | 0.0008                  | 0.15                     |
| rs10275489 | MMP17        | 0.0036                  | 0.15                     |

|            |           |        |       |
|------------|-----------|--------|-------|
| rs12535394 | PROP1     | 0.0035 | -0.15 |
| rs12535394 | DDN       | 0.0013 | 0.15  |
| rs12535394 | PUS1      | 0.0006 | 0.15  |
| rs11133360 | LRRTM2    | 0.0059 | -0.14 |
| rs11941492 | RGS13     | 0.0031 | 0.14  |
| rs12535394 | TMEM191A  | 0.0060 | -0.14 |
| rs10275489 | MT4       | 0.0108 | 0.14  |
| rs11941492 | CLEC4C    | 0.0032 | 0.14  |
| rs11133360 | SPSB2     | 0.0012 | 0.14  |
| rs11133360 | PPP4R4    | 0.0011 | -0.14 |
| rs12535394 | LY6G5B    | 0.0021 | 0.14  |
| rs12535394 | ZNF133    | 0.0000 | 0.14  |
| rs12535394 | MFSD2B    | 0.0018 | 0.13  |
| rs12535394 | ENKUR     | 0.0032 | 0.13  |
| rs11133360 | FGF20     | 0.0102 | -0.13 |
| rs12535394 | FAM156A   | 0.0021 | 0.13  |
| rs12535394 | IL32      | 0.0002 | 0.13  |
| rs11133360 | HINT1     | 0.0000 | 0.13  |
| rs11941492 | VCX       | 0.0122 | 0.13  |
| rs11133360 | YBX2      | 0.0041 | 0.13  |
| rs12535394 | OGDHL     | 0.0038 | 0.13  |
| rs12535394 | POU5F2    | 0.0009 | 0.13  |
| rs10275489 | TMIE      | 0.0073 | -0.13 |
| rs10275489 | ARHGEF16  | 0.0007 | 0.13  |
| rs12535394 | ITPKA     | 0.0078 | -0.13 |
| rs11133360 | DHRS4L2   | 0.0060 | 0.13  |
| rs12535394 | METTL17   | 0.0000 | 0.13  |
| rs12535394 | PBX4      | 0.0004 | 0.13  |
| rs11941492 | STAB2     | 0.0006 | 0.13  |
| rs11133360 | PEAR1     | 0.0116 | -0.13 |
| rs11133360 | NPHP3     | 0.0019 | -0.12 |
| rs11133360 | SIL1      | 0.0083 | 0.12  |
| rs12535394 | MEP1A     | 0.0121 | 0.12  |
| rs11133360 | FREM1     | 0.0090 | -0.12 |
| rs11133360 | C20ORF144 | 0.0027 | -0.12 |
| rs12535394 | TFAP2E    | 0.0013 | 0.12  |
| rs11941492 | CETP      | 0.0002 | 0.12  |
| rs11133360 | SIVA1     | 0.0042 | 0.12  |
| rs11941492 | CCL17     | 0.0064 | 0.12  |
| rs10275489 | MST1L     | 0.0103 | 0.12  |
| rs11133360 | DCP1A     | 0.0001 | -0.12 |
| rs11941492 | TNFRSF13C | 0.0034 | 0.12  |
| rs11133360 | NPY5R     | 0.0041 | -0.12 |
| rs11941492 | BLK       | 0.0047 | 0.12  |
| rs12535394 | TCF15     | 0.0070 | 0.12  |
| rs11133360 | EBLN2     | 0.0009 | -0.12 |
| rs12535394 | SLC25A28  | 0.0047 | 0.12  |
| rs11941492 | TTC24     | 0.0002 | 0.12  |
| rs12535394 | PTGDS     | 0.0066 | 0.12  |

|            |           |        |       |
|------------|-----------|--------|-------|
| rs11133360 | KIAA1683  | 0.0028 | -0.12 |
| rs11133360 | KL        | 0.0082 | -0.12 |
| rs12535394 | QPCTL     | 0.0038 | 0.12  |
| rs11941492 | DCBLD2    | 0.0011 | -0.12 |
| rs12535394 | SBF2      | 0.0002 | -0.12 |
| rs12535394 | GALNT12   | 0.0094 | 0.12  |
| rs11941492 | MMRN1     | 0.0002 | 0.12  |
| rs12535394 | LINC00461 | 0.0099 | 0.12  |
| rs11941492 | SNAI3     | 0.0056 | 0.12  |
| rs11133360 | NDUFS6    | 0.0062 | 0.12  |
| rs11941492 | GRAP      | 0.0029 | 0.12  |
| rs11133360 | INE1      | 0.0007 | -0.12 |
| rs11133360 | DST       | 0.0051 | -0.12 |
| rs12535394 | NDUFAF4   | 0.0002 | 0.12  |
| rs11133360 | CHRD1     | 0.0049 | -0.12 |
| rs11941492 | FCRL1     | 0.0031 | 0.12  |
| rs12535394 | RFXANK    | 0.0015 | 0.12  |
| rs11133360 | PRADC1    | 0.0088 | 0.12  |
| rs12535394 | PIWIL4    | 0.0025 | 0.12  |
| rs12535394 | ANGPTL7   | 0.0112 | 0.11  |
| rs12535394 | CLDN17    | 0.0097 | 0.11  |
| rs12535394 | LOXL4     | 0.0048 | 0.11  |
| rs12535394 | PNMA3     | 0.0000 | 0.11  |
| rs11133360 | PCK2      | 0.0009 | 0.11  |
| rs11941492 | MDGA1     | 0.0053 | 0.11  |
| rs10275489 | ZNF90     | 0.0002 | -0.11 |
| rs11133360 | SORD      | 0.0059 | 0.11  |
| rs11133360 | POLR2I    | 0.0027 | 0.11  |
| rs10275489 | LRRN4     | 0.0116 | 0.11  |
| rs10275489 | SLC44A5   | 0.0056 | -0.11 |
| rs11941492 | NAALADL1  | 0.0064 | 0.11  |
| rs12535394 | TTC24     | 0.0058 | 0.11  |
| rs11133360 | DNAH1     | 0.0099 | -0.11 |
| rs11133360 | GALNT16   | 0.0035 | 0.11  |
| rs10275489 | MT2A      | 0.0029 | 0.11  |
| rs11941492 | FCRL3     | 0.0098 | 0.11  |
| rs12535394 | ELFN1     | 0.0081 | -0.11 |
| rs11941492 | AQP2      | 0.0063 | 0.11  |
| rs12535394 | PROCR     | 0.0026 | -0.11 |
| rs12535394 | C9ORF129  | 0.0017 | -0.11 |
| rs12535394 | FAM107A   | 0.0076 | 0.11  |
| rs12535394 | CCDC28B   | 0.0011 | 0.11  |
| rs10275489 | EEF1DP3   | 0.0090 | 0.11  |
| rs11133360 | CAV1      | 0.0072 | -0.11 |
| rs11133360 | NISCH     | 0.0072 | -0.11 |
| rs12535394 | MORN1     | 0.0113 | -0.11 |
| rs11133360 | CUEDC2    | 0.0083 | 0.11  |
| rs12535394 | CHST15    | 0.0002 | -0.11 |
| rs11941492 | ARMC5     | 0.0008 | 0.11  |



|            |               |        |       |
|------------|---------------|--------|-------|
| rs11133360 | MYOZ3         | 0.0065 | 0.11  |
| rs11941492 | FCRL2         | 0.0056 | 0.11  |
| rs11941492 | TNN           | 0.0103 | 0.11  |
| rs11941492 | IL17D         | 0.0053 | 0.11  |
| rs11133360 | OSBPL11       | 0.0005 | -0.11 |
| rs11133360 | LMAN2         | 0.0059 | 0.11  |
| rs12535394 | CHSY3         | 0.0032 | -0.11 |
| rs11941492 | HMHA1         | 0.0075 | 0.11  |
| rs12535394 | NID1          | 0.0106 | -0.11 |
| rs11133360 | IDH3G         | 0.0026 | 0.11  |
| rs12535394 | C19ORF48      | 0.0005 | 0.11  |
| rs10275489 | DDO           | 0.0004 | 0.11  |
| rs12535394 | FAM114A1      | 0.0025 | -0.11 |
| rs11941492 | SCP2D1        | 0.0065 | 0.11  |
| rs12535394 | PER2          | 0.0049 | -0.11 |
| rs11133360 | MAPKBP1       | 0.0036 | -0.11 |
| rs11941492 | ADCYAP1R<br>1 | 0.0017 | 0.11  |
| rs11133360 | ANK2          | 0.0028 | -0.11 |
| rs12535394 | FAM63B        | 0.0035 | -0.11 |
| rs10275489 | TAS2R9        | 0.0004 | -0.11 |
| rs12535394 | SMIM14        | 0.0010 | -0.10 |
| rs11133360 | NLRP3         | 0.0125 | -0.10 |
| rs12535394 | KANK2         | 0.0038 | -0.10 |
| rs12535394 | WRAP53        | 0.0119 | 0.10  |
| rs11133360 | COG6          | 0.0022 | -0.10 |
| rs10275489 | 14-Sep        | 0.0108 | 0.10  |
| rs12535394 | TUBB4A        | 0.0047 | 0.10  |
| rs12535394 | GTF2A1        | 0.0073 | -0.10 |
| rs11133360 | ABCA11P       | 0.0008 | -0.10 |
| rs11133360 | DENND5A       | 0.0020 | -0.10 |
| rs11941492 | SNAP25        | 0.0066 | 0.10  |
| rs11133360 | AMOTL2        | 0.0037 | -0.10 |
| rs10275489 | UGT3A1        | 0.0001 | 0.10  |
| rs12535394 | GLIS3         | 0.0032 | -0.10 |
| rs11941492 | P2RX5         | 0.0079 | 0.10  |
| rs11133360 | CD33          | 0.0069 | -0.10 |
| rs11133360 | DDX3X         | 0.0061 | -0.10 |
| rs12535394 | HMGN3         | 0.0005 | 0.10  |
| rs12535394 | CTSC          | 0.0090 | 0.10  |
| rs12535394 | SNHG15        | 0.0044 | 0.10  |
| rs12535394 | C10ORF90      | 0.0046 | 0.10  |
| rs10275489 | IMPG1         | 0.0023 | 0.10  |
| rs11133360 | FAM217A       | 0.0060 | 0.10  |
| rs11941492 | PPAPDC3       | 0.0045 | 0.10  |
| rs12535394 | CCDC170       | 0.0059 | -0.10 |
| rs11941492 | CNR2          | 0.0021 | 0.10  |
| rs11941492 | MYOZ3         | 0.0015 | 0.10  |
| rs11941492 | LINC00926     | 0.0022 | 0.10  |
| rs11941492 | SIPA1         | 0.0062 | 0.10  |

|            |              |        |       |
|------------|--------------|--------|-------|
| rs12535394 | HAUS7        | 0.0033 | 0.10  |
| rs11941492 | LILRA4       | 0.0023 | 0.10  |
| rs11133360 | ZC3H6        | 0.0024 | -0.10 |
| rs12535394 | TSPAN33      | 0.0001 | 0.10  |
| rs12535394 | ADAMDEC<br>1 | 0.0074 | 0.10  |
| rs11133360 | EMD          | 0.0032 | 0.10  |
| rs12535394 | SSTR3        | 0.0047 | 0.10  |
| rs10275489 | RAP1GAP      | 0.0008 | 0.10  |
| rs11133360 | TMF1         | 0.0051 | -0.10 |
| rs11941492 | USP20        | 0.0036 | 0.10  |
| rs11941492 | GRID1        | 0.0099 | 0.10  |
| rs11133360 | SNRK         | 0.0070 | -0.10 |
| rs11941492 | DTHD1        | 0.0086 | 0.10  |
| rs11941492 | LY9          | 0.0096 | 0.10  |
| rs12535394 | TMEM161A     | 0.0034 | 0.10  |
| rs12535394 | POSTN        | 0.0044 | -0.10 |
| rs11133360 | PAFAH1B3     | 0.0073 | 0.10  |
| rs11133360 | XRCC3        | 0.0043 | 0.10  |
| rs12535394 | CPA5         | 0.0099 | 0.10  |
| rs11941492 | AIRE         | 0.0103 | 0.10  |
| rs11133360 | SACMIL       | 0.0022 | -0.10 |
| rs12535394 | SENP3        | 0.0018 | 0.10  |
| rs12535394 | N4BP2        | 0.0081 | -0.10 |
| rs12535394 | HNRNPC       | 0.0006 | 0.10  |
| rs11941492 | LCN10        | 0.0085 | 0.10  |
| rs12535394 | AIM2         | 0.0042 | 0.10  |
| rs12535394 | LTB          | 0.0088 | 0.10  |
| rs11133360 | PSMD9        | 0.0115 | 0.10  |
| rs11133360 | NELFE        | 0.0066 | 0.10  |
| rs10275489 | INTU         | 0.0016 | 0.10  |
| rs11133360 | LRRC16B      | 0.0053 | 0.10  |
| rs12535394 | TAS1R3       | 0.0037 | -0.10 |
| rs11133360 | PBRM1        | 0.0048 | -0.10 |
| rs12535394 | FAM58A       | 0.0030 | 0.10  |
| rs11133360 | TAS2R13      | 0.0005 | -0.10 |
| rs10275489 | EDA2R        | 0.0081 | 0.10  |
| rs10275489 | MORN1        | 0.0089 | 0.10  |
| rs11941492 | MEOX1        | 0.0097 | 0.10  |
| rs12535394 | TRIM31       | 0.0082 | 0.10  |
| rs11941492 | CLNK         | 0.0093 | 0.10  |
| rs12535394 | C9ORF64      | 0.0050 | -0.10 |
| rs12535394 | FUS          | 0.0061 | 0.10  |
| rs11133360 | SLC44A4      | 0.0010 | 0.10  |
| rs12535394 | TCF12        | 0.0100 | -0.10 |
| rs11133360 | RHOC         | 0.0116 | 0.10  |
| rs11941492 | CMA1         | 0.0031 | 0.10  |
| rs12535394 | WWC2         | 0.0016 | -0.10 |
| rs11133360 | NKTR         | 0.0090 | -0.10 |
| rs11133360 | BAG3         | 0.0076 | 0.10  |

|            |          |        |       |
|------------|----------|--------|-------|
| rs12535394 | ZNF22    | 0.0003 | 0.09  |
| rs11133360 | EXOSC1   | 0.0037 | 0.09  |
| rs12535394 | PABPN1   | 0.0007 | 0.09  |
| rs12535394 | JRKL     | 0.0016 | 0.09  |
| rs12535394 | GLT8D2   | 0.0094 | -0.09 |
| rs12535394 | PYY      | 0.0110 | -0.09 |
| rs11941492 | CCL14    | 0.0113 | 0.09  |
| rs11941492 | ZAP70    | 0.0046 | 0.09  |
| rs12535394 | ST5      | 0.0088 | -0.09 |
| rs12535394 | CUX2     | 0.0025 | 0.09  |
| rs12535394 | ACTRT3   | 0.0053 | 0.09  |
| rs12535394 | TNF      | 0.0011 | 0.09  |
| rs11941492 | RASGRP2  | 0.0052 | 0.09  |
| rs11133360 | SETD2    | 0.0044 | -0.09 |
| rs12535394 | SS18L2   | 0.0047 | 0.09  |
| rs12535394 | SNED1    | 0.0113 | -0.09 |
| rs12535394 | TRIP10   | 0.0079 | 0.09  |
| rs12535394 | MRC2     | 0.0100 | -0.09 |
| rs12535394 | MSL3     | 0.0010 | 0.09  |
| rs11133360 | RGS3     | 0.0054 | 0.09  |
| rs12535394 | TMPRSS13 | 0.0028 | 0.09  |
| rs12535394 | FGF11    | 0.0065 | 0.09  |
| rs11133360 | C6ORF47  | 0.0010 | 0.09  |
| rs12535394 | SH3D19   | 0.0124 | -0.09 |
| rs11133360 | BIK      | 0.0080 | 0.09  |
| rs11133360 | RNASEH2A | 0.0035 | 0.09  |
| rs12535394 | EIF5A    | 0.0041 | 0.09  |
| rs12535394 | ZNF789   | 0.0027 | 0.09  |
| rs11941492 | CCL21    | 0.0022 | 0.09  |
| rs11941492 | BMX      | 0.0095 | 0.09  |
| rs12535394 | FAM71F1  | 0.0068 | 0.09  |
| rs12535394 | COLEC12  | 0.0082 | -0.09 |
| rs11941492 | CD19     | 0.0118 | 0.09  |
| rs12535394 | ARMC6    | 0.0009 | 0.09  |
| rs10275489 | HABP2    | 0.0009 | 0.09  |
| rs11133360 | SFXN4    | 0.0005 | 0.09  |
| rs12535394 | FKBPL    | 0.0042 | 0.09  |
| rs12535394 | ENTPD6   | 0.0028 | 0.09  |
| rs11941492 | ICAM3    | 0.0119 | 0.09  |
| rs12535394 | MAPKBP1  | 0.0102 | -0.09 |
| rs11133360 | DCAF12L1 | 0.0105 | 0.09  |
| rs12535394 | UGT2A3   | 0.0079 | -0.09 |
| rs11133360 | ZNF197   | 0.0024 | -0.09 |
| rs11133360 | XIST     | 0.0082 | -0.09 |
| rs11133360 | CREB5    | 0.0011 | -0.09 |
| rs12535394 | OSGEP    | 0.0001 | 0.09  |
| rs11133360 | ACTR8    | 0.0011 | -0.09 |
| rs11133360 | ZNF445   | 0.0028 | -0.09 |
| rs11133360 | EMILIN2  | 0.0096 | -0.09 |

|            |          |        |       |
|------------|----------|--------|-------|
| rs11133360 | SRD5A3   | 0.0029 | 0.09  |
| rs11133360 | FRMD4B   | 0.0110 | -0.09 |
| rs11133360 | NPY1R    | 0.0051 | -0.09 |
| rs11133360 | NABP2    | 0.0022 | 0.09  |
| rs12535394 | ADORA3   | 0.0092 | -0.09 |
| rs12535394 | SLC35D1  | 0.0027 | -0.09 |
| rs11941492 | PARVG    | 0.0056 | 0.09  |
| rs12535394 | FUT4     | 0.0031 | 0.09  |
| rs12535394 | FAM73A   | 0.0102 | -0.09 |
| rs11941492 | HMGCR    | 0.0009 | 0.09  |
| rs12535394 | SRSF8    | 0.0006 | 0.09  |
| rs11941492 | PAX5     | 0.0072 | 0.09  |
| rs12535394 | TMLHE    | 0.0031 | 0.09  |
| rs11133360 | MAGI1    | 0.0017 | -0.09 |
| rs11133360 | DNPEP    | 0.0092 | 0.09  |
| rs11941492 | CLEC17A  | 0.0036 | 0.09  |
| rs12535394 | TMIGD2   | 0.0114 | 0.09  |
| rs12535394 | SPOCK2   | 0.0114 | 0.09  |
| rs11133360 | CFB      | 0.0076 | 0.09  |
| rs11133360 | LRCH1    | 0.0086 | -0.09 |
| rs12535394 | SAXO1    | 0.0066 | -0.09 |
| rs12535394 | DXO      | 0.0103 | 0.09  |
| rs11941492 | PLA2G6   | 0.0125 | 0.09  |
| rs12535394 | CASC4    | 0.0072 | -0.09 |
| rs11133360 | LSM4     | 0.0060 | 0.09  |
| rs10275489 | CARF     | 0.0039 | 0.09  |
| rs11941492 | PSG4     | 0.0118 | 0.09  |
| rs12535394 | PRIMPOL  | 0.0029 | -0.09 |
| rs11133360 | PRDM10   | 0.0111 | -0.09 |
| rs11941492 | MAGEA1   | 0.0004 | 0.09  |
| rs11133360 | SPATA13  | 0.0026 | -0.09 |
| rs10275489 | SLC25A39 | 0.0004 | -0.09 |
| rs12535394 | NR2C2AP  | 0.0017 | 0.09  |
| rs10275489 | DUSP15   | 0.0055 | -0.09 |
| rs12535394 | AFF3     | 0.0082 | -0.09 |
| rs11133360 | FKBPL    | 0.0063 | 0.09  |
| rs12535394 | CMC2     | 0.0046 | 0.09  |
| rs10275489 | JAK1     | 0.0023 | 0.09  |
| rs12535394 | TIFAB    | 0.0059 | 0.09  |
| rs12535394 | RNF103   | 0.0048 | -0.09 |
| rs12535394 | HPRT1    | 0.0013 | 0.09  |
| rs11133360 | FAM208A  | 0.0052 | -0.09 |
| rs12535394 | ZNF93    | 0.0003 | 0.09  |
| rs12535394 | CD320    | 0.0124 | 0.09  |
| rs11133360 | VPRBP    | 0.0028 | -0.09 |
| rs12535394 | CPSF4    | 0.0024 | 0.09  |
| rs12535394 | MSL3P1   | 0.0046 | 0.09  |
| rs11133360 | SNX4     | 0.0036 | -0.09 |
| rs12535394 | FYCO1    | 0.0041 | -0.09 |

|            |                |        |       |
|------------|----------------|--------|-------|
| rs12535394 | DCANP1         | 0.0084 | 0.09  |
| rs12535394 | CTDNBP1        | 0.0119 | 0.09  |
| rs11941492 | TRAT1          | 0.0104 | 0.09  |
| rs12535394 | SRSF3          | 0.0016 | 0.09  |
| rs11941492 | NCF1B          | 0.0073 | 0.09  |
| rs11941492 | EIF4G3         | 0.0004 | 0.09  |
| rs12535394 | RPSAP58        | 0.0106 | 0.09  |
| rs11133360 | RPLP0          | 0.0075 | 0.09  |
| rs12535394 | OSBPL6         | 0.0029 | -0.09 |
| rs12535394 | EIF4G3         | 0.0045 | -0.09 |
| rs10275489 | GUCA2B         | 0.0025 | 0.09  |
| rs12535394 | THUMPD2        | 0.0105 | 0.09  |
| rs12535394 | PRICKLE2       | 0.0076 | -0.09 |
| rs11941492 | CCDC105        | 0.0055 | 0.09  |
| rs12535394 | PLA1A          | 0.0037 | 0.09  |
| rs11941492 | FOXI2          | 0.0073 | 0.09  |
| rs11941492 | P2RX1          | 0.0036 | 0.09  |
| rs11133360 | GPR142         | 0.0072 | -0.09 |
| rs10275489 | PTPN13         | 0.0024 | 0.09  |
| rs11133360 | BSPRY          | 0.0074 | 0.09  |
| rs11941492 | BANK1          | 0.0060 | 0.09  |
| rs12535394 | GSTM3          | 0.0090 | -0.09 |
| rs12535394 | TIMM9          | 0.0012 | 0.09  |
| rs12535394 | CLEC2D         | 0.0090 | 0.09  |
| rs12535394 | SNHG3          | 0.0085 | 0.09  |
| rs12535394 | SEMA4D         | 0.0079 | 0.09  |
| rs10275489 | CD320          | 0.0042 | -0.09 |
| rs12535394 | ANAPC5         | 0.0010 | 0.09  |
| rs12535394 | FKBP8          | 0.0118 | 0.09  |
| rs11133360 | SLC2A1         | 0.0094 | -0.09 |
| rs12535394 | ZNF518B        | 0.0115 | 0.09  |
| rs11941492 | ADA            | 0.0027 | 0.09  |
| rs11941492 | TLR10          | 0.0049 | 0.09  |
| rs11133360 | OR4B1          | 0.0094 | 0.09  |
| rs10275489 | ST6GALNA<br>C5 | 0.0042 | -0.09 |
| rs11133360 | EPS15          | 0.0079 | -0.09 |
| rs11133360 | GPALPP1        | 0.0029 | -0.09 |
| rs11133360 | RPL32P3        | 0.0087 | -0.09 |
| rs11133360 | CENPU          | 0.0028 | 0.09  |
| rs12535394 | SH2D2A         | 0.0058 | 0.09  |
| rs10275489 | AHDC1          | 0.0075 | 0.09  |
| rs11133360 | MYO5A          | 0.0102 | -0.09 |
| rs12535394 | ADAMTS2        | 0.0078 | -0.09 |
| rs11941492 | FAM151A        | 0.0002 | 0.09  |
| rs11941492 | C11ORF21       | 0.0110 | 0.09  |
| rs12535394 | OTUD5          | 0.0125 | 0.09  |
| rs11133360 | ASB1           | 0.0109 | -0.09 |
| rs11133360 | C2ORF54        | 0.0041 | 0.09  |
| rs11133360 | KCNJ11         | 0.0070 | 0.09  |

|            |          |        |       |
|------------|----------|--------|-------|
| rs12535394 | HGF      | 0.0082 | -0.09 |
| rs10275489 | EIF4G3   | 0.0013 | 0.09  |
| rs11133360 | ALOX5    | 0.0102 | -0.09 |
| rs10275489 | FGG      | 0.0029 | 0.08  |
| rs11133360 | 1-Mar    | 0.0108 | -0.08 |
| rs12535394 | DHX15    | 0.0039 | -0.08 |
| rs11133360 | C10ORF95 | 0.0021 | 0.08  |
| rs12535394 | RAB27B   | 0.0080 | -0.08 |
| rs12535394 | KLHL31   | 0.0086 | 0.08  |
| rs10275489 | PCDHGA6  | 0.0013 | 0.08  |
| rs12535394 | SIRT4    | 0.0100 | 0.08  |
| rs11941492 | IL16     | 0.0033 | 0.08  |
| rs12535394 | GHRLOS   | 0.0015 | 0.08  |
| rs11941492 | FAM129C  | 0.0077 | 0.08  |
| rs10275489 | SULT1A1  | 0.0054 | 0.08  |
| rs10275489 | PPAN     | 0.0118 | -0.08 |
| rs12535394 | TMEM123  | 0.0011 | 0.08  |
| rs12535394 | TDP1     | 0.0006 | 0.08  |
| rs12535394 | GSPT2    | 0.0048 | 0.08  |
| rs11941492 | CD209    | 0.0090 | 0.08  |
| rs12535394 | AKIP1    | 0.0067 | -0.08 |
| rs12535394 | MYOF     | 0.0113 | -0.08 |
| rs10275489 | CRYAB    | 0.0048 | -0.08 |
| rs11133360 | TBCB     | 0.0065 | 0.08  |
| rs12535394 | CCDC71L  | 0.0014 | 0.08  |
| rs11133360 | FGF13    | 0.0045 | 0.08  |
| rs12535394 | RBM47    | 0.0048 | -0.08 |
| rs10275489 | SBF2     | 0.0025 | 0.08  |
| rs11941492 | DNPEP    | 0.0025 | 0.08  |
| rs11133360 | TMEM177  | 0.0076 | 0.08  |
| rs11133360 | SRP19    | 0.0052 | 0.08  |
| rs12535394 | TMEM87A  | 0.0072 | -0.08 |
| rs12535394 | NEDD8    | 0.0034 | 0.08  |
| rs10275489 | WWC2     | 0.0013 | 0.08  |
| rs11941492 | PEX10    | 0.0014 | 0.08  |
| rs12535394 | GABRA3   | 0.0014 | 0.08  |
| rs12535394 | TRIAP1   | 0.0043 | 0.08  |
| rs11941492 | TREML2   | 0.0028 | 0.08  |
| rs11133360 | STON2    | 0.0041 | 0.08  |
| rs10275489 | FGB      | 0.0027 | 0.08  |
| rs12535394 | SLC25A39 | 0.0054 | 0.08  |
| rs11133360 | CATSPER3 | 0.0119 | 0.08  |
| rs10275489 | MYRF     | 0.0067 | -0.08 |
| rs11133360 | BTBD6    | 0.0050 | 0.08  |
| rs11133360 | SAR1B    | 0.0057 | 0.08  |
| rs11941492 | MRGPRX2  | 0.0022 | 0.08  |
| rs12535394 | RTKN2    | 0.0002 | 0.08  |
| rs12535394 | NANP     | 0.0003 | 0.08  |
| rs12535394 | HMSD     | 0.0067 | 0.08  |

|            |           |        |       |
|------------|-----------|--------|-------|
| rs12535394 | WDR19     | 0.0071 | -0.08 |
| rs11941492 | WBP11     | 0.0055 | 0.08  |
| rs11941492 | LINC00592 | 0.0057 | 0.08  |
| rs12535394 | TAS2R46   | 0.0088 | -0.08 |
| rs12535394 | NINL      | 0.0040 | 0.08  |
| rs12535394 | GPD1L     | 0.0060 | -0.08 |
| rs11941492 | CD79B     | 0.0097 | 0.08  |
| rs11133360 | AKAP5     | 0.0085 | 0.08  |
| rs10275489 | LECT2     | 0.0113 | 0.08  |
| rs11941492 | PIK3IP1   | 0.0102 | 0.08  |
| rs12535394 | TRAPPC11  | 0.0035 | -0.08 |
| rs11133360 | GTF2IRD2B | 0.0055 | -0.08 |
| rs11133360 | PDZD11    | 0.0031 | 0.08  |
| rs11941492 | CFP       | 0.0113 | 0.08  |
| rs12535394 | RANBP17   | 0.0068 | 0.08  |
| rs11941492 | PRKCB     | 0.0100 | 0.08  |
| rs12535394 | CALR      | 0.0071 | 0.08  |
| rs12535394 | TIGD1     | 0.0052 | 0.08  |
| rs10275489 | DZIP1L    | 0.0069 | -0.08 |
| rs12535394 | ACVR1     | 0.0105 | -0.08 |
| rs12535394 | DDX26B    | 0.0066 | 0.08  |
| rs10275489 | DNAH7     | 0.0069 | 0.08  |
| rs12535394 | RAN       | 0.0029 | 0.08  |
| rs11941492 | QPRT      | 0.0116 | 0.08  |
| rs11133360 | NRM       | 0.0020 | 0.08  |
| rs10275489 | OSBPL5    | 0.0122 | 0.08  |
| rs11941492 | DPP6      | 0.0089 | 0.08  |
| rs11133360 | IP6K1     | 0.0033 | -0.08 |
| rs12535394 | RPS10     | 0.0099 | 0.08  |
| rs11941492 | SLC30A3   | 0.0108 | 0.08  |
| rs12535394 | IL21      | 0.0111 | 0.08  |
| rs11941492 | RYBP      | 0.0011 | -0.08 |
| rs10275489 | GADD45A   | 0.0053 | 0.08  |
| rs11133360 | IFNAR2    | 0.0035 | -0.08 |
| rs12535394 | ADAT2     | 0.0025 | 0.08  |
| rs11941492 | PARP15    | 0.0053 | 0.08  |
| rs12535394 | TPTEP1    | 0.0106 | 0.08  |
| rs10275489 | SERINC1   | 0.0018 | 0.08  |
| rs10275489 | CLHC1     | 0.0098 | 0.08  |
| rs11941492 | MAS1L     | 0.0099 | 0.08  |
| rs11133360 | MORC3     | 0.0123 | -0.08 |
| rs12535394 | MTMR2     | 0.0023 | 0.08  |
| rs12535394 | GATAD2A   | 0.0003 | 0.08  |
| rs12535394 | DTD1      | 0.0010 | 0.08  |
| rs12535394 | AUNIP     | 0.0108 | 0.08  |
| rs11941492 | GPR18     | 0.0107 | 0.08  |
| rs12535394 | TBRG4     | 0.0061 | 0.08  |
| rs12535394 | IL3       | 0.0046 | 0.08  |
| rs11941492 | GPR183    | 0.0054 | 0.08  |

|            |          |        |       |
|------------|----------|--------|-------|
| rs10275489 | ENTPD6   | 0.0024 | -0.08 |
| rs12535394 | PCDHGA6  | 0.0100 | -0.08 |
| rs12535394 | HNRNPL   | 0.0070 | 0.08  |
| rs10275489 | DCAF4    | 0.0021 | -0.08 |
| rs10275489 | ECE1     | 0.0099 | 0.08  |
| rs11941492 | MAEL     | 0.0019 | 0.08  |
| rs12535394 | SLC35B4  | 0.0075 | 0.08  |
| rs10275489 | DAO      | 0.0045 | 0.08  |
| rs12535394 | TMEM184A | 0.0100 | -0.08 |
| rs11941492 | PPFIA4   | 0.0036 | -0.08 |
| rs11133360 | ZNF589   | 0.0056 | -0.08 |
| rs12535394 | PLEKHB2  | 0.0112 | -0.08 |
| rs12535394 | MCOLN2   | 0.0123 | 0.08  |
| rs12535394 | FAM209A  | 0.0118 | 0.08  |
| rs12535394 | ZNF32    | 0.0078 | 0.08  |
| rs12535394 | EXOSC5   | 0.0107 | 0.08  |
| rs11941492 | FOXF2    | 0.0074 | 0.08  |
| rs11941492 | GVINP1   | 0.0064 | 0.08  |
| rs11941492 | METTL24  | 0.0034 | 0.08  |
| rs11133360 | PPA2     | 0.0117 | 0.08  |
| rs12535394 | CDK2AP1  | 0.0032 | 0.08  |
| rs11941492 | CNNM1    | 0.0012 | 0.08  |
| rs12535394 | SH2B2    | 0.0034 | 0.08  |
| rs10275489 | MGST1    | 0.0070 | 0.08  |
| rs11133360 | DIS3     | 0.0032 | -0.08 |
| rs12535394 | MED26    | 0.0013 | 0.08  |
| rs11941492 | FCER2    | 0.0079 | 0.08  |
| rs12535394 | MOGS     | 0.0083 | 0.08  |
| rs11941492 | SSTR3    | 0.0056 | 0.08  |
| rs11133360 | C2CD2    | 0.0104 | -0.08 |
| rs12535394 | CD160    | 0.0080 | 0.08  |
| rs10275489 | ZNF578   | 0.0016 | -0.08 |
| rs12535394 | ADCK1    | 0.0083 | 0.08  |
| rs11941492 | TRABD2A  | 0.0068 | 0.08  |
| rs12535394 | PITHD1   | 0.0073 | 0.08  |
| rs12535394 | CCDC14   | 0.0098 | 0.08  |
| rs10275489 | OR2A2    | 0.0029 | 0.08  |
| rs11133360 | GRHPR    | 0.0105 | 0.08  |
| rs12535394 | FAM218A  | 0.0087 | 0.08  |
| rs12535394 | DIAPH2   | 0.0054 | 0.08  |
| rs11133360 | RYBP     | 0.0120 | -0.08 |
| rs11941492 | PDE6G    | 0.0064 | 0.08  |
| rs10275489 | FRY      | 0.0107 | 0.08  |
| rs11941492 | CLPS     | 0.0100 | 0.08  |
| rs11133360 | POLR2H   | 0.0040 | 0.08  |
| rs12535394 | ANKRD49  | 0.0012 | 0.08  |
| rs12535394 | BID      | 0.0081 | 0.08  |
| rs10275489 | HIST2H3D | 0.0102 | 0.08  |
| rs11941492 | MYO1G    | 0.0121 | 0.08  |



|            |                |        |       |
|------------|----------------|--------|-------|
| rs11941492 | CTSG           | 0.0088 | 0.08  |
| rs11133360 | ASF1B          | 0.0078 | 0.08  |
| rs11133360 | GTF2IRD2       | 0.0097 | -0.08 |
| rs12535394 | PNMA6A         | 0.0012 | 0.08  |
| rs11941492 | INADL          | 0.0073 | -0.08 |
| rs11941492 | DPPA4          | 0.0065 | 0.08  |
| rs11941492 | LCN8           | 0.0028 | 0.08  |
| rs11133360 | GLRX5          | 0.0098 | 0.08  |
| rs11133360 | RBM26          | 0.0101 | -0.08 |
| rs11133360 | USP16          | 0.0031 | -0.08 |
| rs12535394 | EFNB2          | 0.0066 | -0.08 |
| rs12535394 | PDE9A          | 0.0018 | 0.08  |
| rs10275489 | SENP3          | 0.0042 | -0.08 |
| rs10275489 | RASL11A        | 0.0059 | 0.08  |
| rs10275489 | GNA14          | 0.0039 | 0.08  |
| rs12535394 | ANKS6          | 0.0088 | 0.08  |
| rs12535394 | CCDC58         | 0.0030 | 0.08  |
| rs11941492 | ST6GALNA<br>C6 | 0.0069 | 0.08  |
| rs12535394 | CDCA7          | 0.0119 | 0.08  |
| rs12535394 | SERINC1        | 0.0108 | -0.08 |
| rs12535394 | FOXRED1        | 0.0074 | 0.08  |
| rs11133360 | SFR1           | 0.0094 | 0.08  |
| rs10275489 | GRAMD1C        | 0.0079 | 0.08  |
| rs12535394 | TTK            | 0.0054 | 0.08  |
| rs11941492 | GRXCR1         | 0.0030 | 0.08  |
| rs11941492 | XCR1           | 0.0019 | 0.08  |
| rs12535394 | CCNB1IP1       | 0.0009 | 0.08  |
| rs10275489 | MAP3K12        | 0.0103 | 0.08  |
| rs11133360 | VPS36          | 0.0104 | -0.08 |
| rs10275489 | GUCY2C         | 0.0035 | -0.08 |
| rs12535394 | PSMB5          | 0.0011 | 0.08  |
| rs11941492 | LHX6           | 0.0011 | 0.08  |
| rs11133360 | SLMAP          | 0.0123 | -0.08 |
| rs11941492 | LDHAL6A        | 0.0039 | 0.08  |
| rs12535394 | PUS3           | 0.0040 | 0.08  |
| rs11133360 | TSC1           | 0.0119 | -0.08 |
| rs12535394 | ZNF394         | 0.0035 | 0.08  |
| rs11941492 | C9ORF57        | 0.0013 | 0.08  |
| rs12535394 | IL18BP         | 0.0086 | 0.08  |
| rs10275489 | KCNK15         | 0.0126 | 0.08  |
| rs10275489 | MRPL4          | 0.0104 | -0.08 |
| rs12535394 | PITPNM2        | 0.0082 | 0.08  |
| rs12535394 | HMGA1          | 0.0054 | 0.08  |
| rs12535394 | ALG6           | 0.0028 | 0.08  |
| rs12535394 | ITGB1BP1       | 0.0045 | 0.08  |
| rs12535394 | BMP4           | 0.0063 | -0.08 |
| rs12535394 | RELB           | 0.0115 | 0.08  |
| rs11133360 | CACNB3         | 0.0093 | 0.08  |
| rs10275489 | ORAI1          | 0.0107 | -0.08 |

|            |          |        |       |
|------------|----------|--------|-------|
| rs11941492 | SEC1P    | 0.0018 | 0.08  |
| rs12535394 | KCNJ14   | 0.0015 | 0.08  |
| rs12535394 | UBA52    | 0.0035 | 0.08  |
| rs12535394 | IL2RG    | 0.0100 | 0.08  |
| rs12535394 | STEAP1B  | 0.0087 | 0.08  |
| rs11941492 | GRK6     | 0.0041 | 0.08  |
| rs10275489 | GLIS3    | 0.0112 | 0.08  |
| rs10275489 | C2ORF54  | 0.0025 | 0.08  |
| rs12535394 | KRI1     | 0.0055 | 0.08  |
| rs12535394 | ZNF35    | 0.0087 | 0.08  |
| rs12535394 | ZNF140   | 0.0100 | 0.08  |
| rs12535394 | DCUN1D5  | 0.0021 | 0.08  |
| rs10275489 | CHST15   | 0.0022 | 0.08  |
| rs12535394 | ZNF253   | 0.0102 | 0.08  |
| rs12535394 | ZNF609   | 0.0020 | -0.08 |
| rs11941492 | SP110    | 0.0025 | 0.08  |
| rs11941492 | PTCRA    | 0.0064 | 0.08  |
| rs11133360 | EIF3K    | 0.0120 | 0.08  |
| rs12535394 | NGDN     | 0.0001 | 0.08  |
| rs11941492 | ALOX12P2 | 0.0103 | -0.08 |
| rs11133360 | SLC6A5   | 0.0122 | 0.08  |
| rs11941492 | CCDC69   | 0.0106 | 0.08  |
| rs10275489 | ARHGEF10 | 0.0082 | 0.08  |
|            | L        |        |       |
| rs11941492 | ZNF876P  | 0.0063 | -0.08 |
| rs12535394 | SLC24A1  | 0.0023 | -0.08 |
| rs12535394 | RASSF4   | 0.0037 | 0.08  |
| rs11133360 | RNF123   | 0.0068 | -0.08 |
| rs12535394 | EFS      | 0.0051 | 0.07  |
| rs11941492 | MUSTN1   | 0.0116 | 0.07  |
| rs11133360 | FNBP1    | 0.0122 | -0.07 |
| rs12535394 | SMPDL3B  | 0.0122 | 0.07  |
| rs10275489 | ARHGAP18 | 0.0082 | 0.07  |
| rs10275489 | ZNF133   | 0.0030 | -0.07 |
| rs10275489 | PRIMPOL  | 0.0039 | 0.07  |
| rs11941492 | CD72     | 0.0083 | 0.07  |
| rs10275489 | GNRHR    | 0.0089 | 0.07  |
| rs12535394 | POLD2    | 0.0126 | 0.07  |
| rs12535394 | APH1B    | 0.0106 | -0.07 |
| rs12535394 | ACIN1    | 0.0113 | 0.07  |
| rs10275489 | NFE2L2   | 0.0084 | 0.07  |
| rs11941492 | TMEM14E  | 0.0036 | 0.07  |
| rs12535394 | S1PR3    | 0.0122 | -0.07 |
| rs12535394 | KDM2B    | 0.0037 | 0.07  |
| rs11133360 | ERH      | 0.0060 | 0.07  |
| rs11941492 | HSPA1B   | 0.0094 | -0.07 |
| rs10275489 | IQCH     | 0.0073 | 0.07  |
| rs11941492 | RALGDS   | 0.0035 | 0.07  |
| rs11941492 | PTF1A    | 0.0017 | 0.07  |
| rs11133360 | UROS     | 0.0019 | 0.07  |

|            |           |        |       |
|------------|-----------|--------|-------|
| rs11133360 | COPS6     | 0.0070 | 0.07  |
| rs12535394 | NKRF      | 0.0032 | 0.07  |
| rs11941492 | DOCK10    | 0.0043 | 0.07  |
| rs10275489 | EIF4G2    | 0.0017 | 0.07  |
| rs11133360 | LPAR2     | 0.0026 | 0.07  |
| rs12535394 | LIAS      | 0.0123 | -0.07 |
| rs11941492 | KIF17     | 0.0099 | 0.07  |
| rs11941492 | PLEKHM2   | 0.0084 | 0.07  |
| rs10275489 | ERBB4     | 0.0095 | 0.07  |
| rs12535394 | GABRP     | 0.0030 | 0.07  |
| rs11941492 | TCL1A     | 0.0070 | 0.07  |
| rs12535394 | SMIM10L2  | 0.0063 | 0.07  |
|            | B         |        |       |
| rs11133360 | TMCC1     | 0.0032 | -0.07 |
| rs11133360 | LDOC1     | 0.0020 | 0.07  |
| rs11941492 | FAM213B   | 0.0038 | 0.07  |
| rs12535394 | FDX1      | 0.0102 | 0.07  |
| rs11941492 | ABCA7     | 0.0108 | 0.07  |
| rs10275489 | TBC1D19   | 0.0071 | 0.07  |
| rs10275489 | NPSR1     | 0.0007 | 0.07  |
| rs12535394 | SMIM5     | 0.0099 | 0.07  |
| rs12535394 | GLIPR2    | 0.0066 | 0.07  |
| rs10275489 | GCNT1     | 0.0079 | 0.07  |
| rs11133360 | KDM5C     | 0.0092 | -0.07 |
| rs12535394 | KRT222    | 0.0095 | -0.07 |
| rs12535394 | DNAJC2    | 0.0033 | 0.07  |
| rs10275489 | PCBP4     | 0.0074 | -0.07 |
| rs12535394 | LINC00493 | 0.0075 | 0.07  |
| rs12535394 | METTL20   | 0.0069 | -0.07 |
| rs10275489 | ATP10D    | 0.0086 | 0.07  |
| rs12535394 | ZNF738    | 0.0079 | 0.07  |
| rs11941492 | YWHAE     | 0.0011 | -0.07 |
| rs11941492 | UBAC1     | 0.0112 | 0.07  |
| rs12535394 | MAGED4    | 0.0006 | 0.07  |
| rs11133360 | UBA3      | 0.0097 | -0.07 |
| rs11133360 | TANK      | 0.0121 | -0.07 |
| rs10275489 | PGP       | 0.0090 | -0.07 |
| rs12535394 | ANAPC7    | 0.0045 | 0.07  |
| rs11941492 | P2RY10    | 0.0028 | 0.07  |
| rs11941492 | ISL2      | 0.0046 | 0.07  |
| rs12535394 | COQ10B    | 0.0070 | -0.07 |
| rs12535394 | ZNF485    | 0.0110 | 0.07  |
| rs12535394 | SOGA1     | 0.0005 | -0.07 |
| rs11133360 | EZH1      | 0.0121 | -0.07 |
| rs12535394 | SEPSECS   | 0.0098 | -0.07 |
| rs10275489 | GANC      | 0.0030 | 0.07  |
| rs11941492 | RBM18     | 0.0041 | 0.07  |
| rs11133360 | ZNF727    | 0.0091 | -0.07 |
| rs12535394 | SIM2      | 0.0077 | 0.07  |
| rs11133360 | HCN1      | 0.0038 | -0.07 |

|            |           |        |       |
|------------|-----------|--------|-------|
| rs12535394 | CTNND1    | 0.0045 | -0.07 |
| rs11133360 | PSME2     | 0.0045 | 0.07  |
| rs12535394 | ZNF682    | 0.0068 | 0.07  |
| rs11133360 | H2AFZ     | 0.0084 | 0.07  |
| rs11941492 | MS4A1     | 0.0074 | 0.07  |
| rs12535394 | OMP       | 0.0063 | 0.07  |
| rs10275489 | C17ORF53  | 0.0021 | -0.07 |
| rs10275489 | ZNF398    | 0.0008 | -0.07 |
| rs11941492 | FAM65B    | 0.0106 | 0.07  |
| rs12535394 | TRIM38    | 0.0065 | 0.07  |
| rs11941492 | RERE      | 0.0041 | 0.07  |
| rs10275489 | C2ORF78   | 0.0123 | 0.07  |
| rs11941492 | TMEM131   | 0.0073 | 0.07  |
| rs11133360 | PSMA5     | 0.0095 | 0.07  |
| rs11941492 | KCNA3     | 0.0118 | 0.07  |
| rs12535394 | ZNRD1     | 0.0120 | 0.07  |
| rs11133360 | ORMDL2    | 0.0100 | 0.07  |
| rs12535394 | LINC00852 | 0.0113 | 0.07  |
| rs10275489 | TPTEP1    | 0.0085 | -0.07 |
| rs10275489 | KIAA1211  | 0.0080 | 0.07  |
| rs10275489 | COQ10B    | 0.0019 | 0.07  |
| rs11133360 | MRPS18A   | 0.0091 | 0.07  |
| rs10275489 | CASP3     | 0.0089 | 0.07  |
| rs12535394 | WISP3     | 0.0062 | 0.07  |
| rs11133360 | HIATL1    | 0.0092 | 0.07  |
| rs10275489 | 5-Sep     | 0.0117 | -0.07 |
| rs12535394 | BBS4      | 0.0109 | -0.07 |
| rs10275489 | ANKRD53   | 0.0097 | -0.07 |
| rs12535394 | THNSL1    | 0.0033 | 0.07  |
| rs11941492 | ZNF445    | 0.0042 | -0.07 |
| rs12535394 | ARL9      | 0.0054 | 0.07  |
| rs11941492 | PIP4K2A   | 0.0041 | 0.07  |
| rs11133360 | TMEM185B  | 0.0105 | 0.07  |
| rs11133360 | MTRF1     | 0.0124 | -0.07 |
| rs12535394 | STMN1     | 0.0107 | 0.07  |
| rs12535394 | OXA1L     | 0.0003 | 0.07  |
| rs12535394 | ZNF398    | 0.0052 | 0.07  |
| rs12535394 | MARCKSL1  | 0.0094 | 0.07  |
| rs10275489 | IMPA2     | 0.0107 | -0.07 |
| rs12535394 | C11ORF73  | 0.0099 | 0.07  |
| rs11133360 | DNAJC22   | 0.0125 | 0.07  |
| rs12535394 | ARF5      | 0.0102 | 0.07  |
| rs11941492 | TCAIM     | 0.0027 | -0.07 |
| rs10275489 | GTF3C3    | 0.0044 | 0.07  |
| rs11941492 | GZMK      | 0.0099 | 0.07  |
| rs11133360 | NAA10     | 0.0059 | 0.07  |
| rs10275489 | CPN2      | 0.0122 | 0.07  |
| rs12535394 | TMEM39B   | 0.0048 | 0.07  |
| rs10275489 | C8B       | 0.0111 | 0.07  |

|            |              |        |       |
|------------|--------------|--------|-------|
| rs11941492 | PANK4        | 0.0080 | 0.07  |
| rs12535394 | LPAR2        | 0.0043 | 0.07  |
| rs10275489 | SLC35A5      | 0.0018 | 0.07  |
| rs11941492 | PRSS58       | 0.0075 | 0.07  |
| rs11941492 | DOCK11       | 0.0120 | 0.07  |
| rs11941492 | PRKAR2B      | 0.0084 | 0.07  |
| rs11941492 | SOX15        | 0.0047 | 0.07  |
| rs10275489 | SLC35D1      | 0.0082 | 0.07  |
| rs12535394 | RPS7         | 0.0048 | 0.07  |
| rs12535394 | ADD1         | 0.0042 | -0.07 |
| rs11133360 | PRSS30P      | 0.0108 | 0.07  |
| rs11941492 | SHQ1         | 0.0013 | -0.07 |
| rs12535394 | LRRC34       | 0.0070 | 0.07  |
| rs12535394 | SSBP1        | 0.0019 | 0.07  |
| rs12535394 | RRAS2        | 0.0116 | 0.07  |
| rs11133360 | RAC3         | 0.0061 | 0.07  |
| rs10275489 | TRAPPC11     | 0.0043 | 0.07  |
| rs10275489 | TYW5         | 0.0126 | 0.07  |
| rs11133360 | ZXDC         | 0.0107 | -0.07 |
| rs10275489 | ANKLE1       | 0.0053 | -0.07 |
| rs12535394 | IDI2         | 0.0013 | 0.07  |
| rs11941492 | LOXHD1       | 0.0062 | 0.07  |
| rs10275489 | TDP1         | 0.0011 | -0.07 |
| rs11941492 | SLC12A8      | 0.0031 | -0.07 |
| rs12535394 | LSM2         | 0.0100 | 0.07  |
| rs11941492 | CYP26C1      | 0.0085 | 0.07  |
| rs11941492 | MAST3        | 0.0066 | 0.07  |
| rs12535394 | FAM120A<br>S | 0.0106 | -0.07 |
| rs12535394 | ZNF286A      | 0.0046 | 0.07  |
| rs12535394 | PNN          | 0.0069 | 0.07  |
| rs12535394 | STX19        | 0.0107 | 0.07  |
| rs12535394 | WDR37        | 0.0085 | 0.07  |
| rs10275489 | ADGRV1       | 0.0052 | 0.07  |
| rs11941492 | RER1         | 0.0050 | 0.07  |
| rs11133360 | ZBTB9        | 0.0124 | 0.07  |
| rs10275489 | NMNAT1       | 0.0047 | 0.07  |
| rs10275489 | NANP         | 0.0006 | -0.07 |
| rs11133360 | PARP4        | 0.0112 | -0.07 |
| rs11941492 | AMIGO2       | 0.0122 | 0.07  |
| rs12535394 | ELAVL1       | 0.0056 | 0.07  |
| rs12535394 | C7ORF73      | 0.0015 | 0.07  |
| rs12535394 | IRAK1BP1     | 0.0037 | 0.07  |
| rs12535394 | ZNF85        | 0.0085 | 0.07  |
| rs10275489 | CFAP44       | 0.0110 | 0.07  |
| rs10275489 | RWDD4        | 0.0033 | 0.07  |
| rs11133360 | POP7         | 0.0109 | 0.07  |
| rs12535394 | XPR1         | 0.0066 | -0.07 |
| rs12535394 | DDX10        | 0.0090 | 0.07  |
| rs11941492 | GPR142       | 0.0100 | 0.07  |

|            |           |        |       |
|------------|-----------|--------|-------|
| rs10275489 | SEMA4G    | 0.0109 | -0.07 |
| rs12535394 | CWC15     | 0.0039 | 0.07  |
| rs12535394 | EXT2      | 0.0120 | 0.07  |
| rs11941492 | CDCP1     | 0.0091 | -0.07 |
| rs12535394 | DZIP1     | 0.0013 | 0.07  |
| rs10275489 | SKA3      | 0.0088 | -0.07 |
| rs12535394 | EPS8      | 0.0101 | -0.07 |
| rs12535394 | IL27RA    | 0.0061 | 0.07  |
| rs10275489 | ATP6V0E2  | 0.0080 | -0.07 |
| rs10275489 | SPIN2A    | 0.0095 | -0.07 |
| rs12535394 | CHEK2     | 0.0088 | 0.07  |
| rs12535394 | COMMD9    | 0.0049 | 0.07  |
| rs11133360 | SLC45A3   | 0.0037 | -0.07 |
| rs12535394 | ZCCHC17   | 0.0073 | 0.07  |
| rs12535394 | PSMB2     | 0.0121 | 0.07  |
| rs10275489 | IL13RA1   | 0.0025 | 0.07  |
| rs10275489 | ZNF280A   | 0.0124 | -0.07 |
| rs12535394 | IRGQ      | 0.0079 | 0.07  |
| rs12535394 | SLC35A5   | 0.0113 | -0.07 |
| rs11941492 | IRX2      | 0.0071 | -0.07 |
| rs11941492 | KIAA1143  | 0.0051 | -0.07 |
| rs11133360 | C19ORF47  | 0.0016 | 0.07  |
| rs12535394 | DUSP9     | 0.0018 | 0.07  |
| rs12535394 | PUS7      | 0.0048 | 0.07  |
| rs10275489 | EFNB2     | 0.0068 | 0.07  |
| rs12535394 | SRSF12    | 0.0114 | 0.07  |
| rs11941492 | PDIA3     | 0.0081 | -0.07 |
| rs12535394 | BRIX1     | 0.0034 | 0.07  |
| rs12535394 | CDC7      | 0.0097 | 0.07  |
| rs12535394 | LINC00839 | 0.0053 | 0.07  |
| rs11133360 | FANCC     | 0.0081 | 0.07  |
| rs11133360 | MSI2      | 0.0057 | 0.07  |
| rs10275489 | SLC35B4   | 0.0102 | -0.07 |
| rs12535394 | ESYT1     | 0.0095 | -0.07 |
| rs12535394 | ZCCHC4    | 0.0102 | -0.07 |
| rs12535394 | PARP2     | 0.0007 | 0.07  |
| rs10275489 | FGA       | 0.0115 | 0.07  |
| rs11133360 | STARD7    | 0.0126 | 0.06  |
| rs11941492 | GPR61     | 0.0076 | 0.06  |
| rs11133360 | XKR3      | 0.0056 | 0.06  |
| rs12535394 | CTR9      | 0.0054 | -0.06 |
| rs10275489 | CAP1      | 0.0076 | 0.06  |
| rs11133360 | MEA1      | 0.0069 | 0.06  |
| rs12535394 | RYK       | 0.0067 | 0.06  |
| rs12535394 | HMGN4     | 0.0033 | 0.06  |
| rs10275489 | SPRED2    | 0.0113 | 0.06  |
| rs12535394 | EEF1E1    | 0.0102 | 0.06  |
| rs11133360 | FEN1      | 0.0087 | 0.06  |
| rs10275489 | MAPK1IP1  | 0.0059 | -0.06 |
|            | L         |        |       |

|            |           |        |       |
|------------|-----------|--------|-------|
| rs11941492 | GRTP1     | 0.0079 | -0.06 |
| rs12535394 | CEP57     | 0.0082 | 0.06  |
| rs11133360 | ZC3H13    | 0.0065 | -0.06 |
| rs12535394 | PDSS1     | 0.0012 | 0.06  |
| rs11941492 | ASAP3     | 0.0111 | 0.06  |
| rs12535394 | ASB12     | 0.0046 | 0.06  |
| rs12535394 | IPO4      | 0.0060 | 0.06  |
| rs10275489 | SF3B1     | 0.0043 | 0.06  |
| rs11941492 | GHRL      | 0.0068 | 0.06  |
| rs11133360 | AKAP10    | 0.0119 | -0.06 |
| rs12535394 | CASP2     | 0.0047 | 0.06  |
| rs10275489 | TIMM9     | 0.0058 | -0.06 |
| rs12535394 | TRIT1     | 0.0015 | 0.06  |
| rs11133360 | UCP2      | 0.0060 | 0.06  |
| rs12535394 | MRAS      | 0.0022 | 0.06  |
| rs11133360 | TRIM26    | 0.0084 | 0.06  |
| rs11133360 | MRPL2     | 0.0063 | 0.06  |
| rs12535394 | MPV17L2   | 0.0093 | 0.06  |
| rs11941492 | GPR15     | 0.0051 | 0.06  |
| rs11133360 | AHCY      | 0.0042 | 0.06  |
| rs12535394 | FAM19A3   | 0.0073 | 0.06  |
| rs12535394 | CYB5R1    | 0.0077 | -0.06 |
| rs11133360 | ELN       | 0.0093 | 0.06  |
| rs10275489 | SERPIND1  | 0.0123 | 0.06  |
| rs12535394 | C10ORF111 | 0.0099 | 0.06  |
| rs12535394 | MRPL42    | 0.0089 | 0.06  |
| rs12535394 | AK2       | 0.0080 | 0.06  |
| rs10275489 | H3F3C     | 0.0102 | 0.06  |
| rs12535394 | COA6      | 0.0043 | 0.06  |
| rs12535394 | NHLRC1    | 0.0094 | 0.06  |
| rs12535394 | GLRX3     | 0.0117 | 0.06  |
| rs10275489 | CLCN5     | 0.0089 | -0.06 |
| rs11133360 | OCLM      | 0.0095 | -0.06 |
| rs11133360 | PARL      | 0.0023 | 0.06  |
| rs10275489 | RNF146    | 0.0051 | 0.06  |
| rs11133360 | RYK       | 0.0106 | -0.06 |
| rs10275489 | POLE2     | 0.0020 | -0.06 |
| rs11941492 | DCUN1D4   | 0.0089 | -0.06 |
| rs11941492 | MLNR      | 0.0020 | 0.06  |
| rs12535394 | PLEKHA6   | 0.0042 | -0.06 |
| rs10275489 | ARL14     | 0.0003 | 0.06  |
| rs10275489 | IGFBP1    | 0.0122 | 0.06  |
| rs12535394 | RPN1      | 0.0058 | 0.06  |
| rs11941492 | SIM2      | 0.0045 | -0.06 |
| rs11133360 | ZSCAN29   | 0.0127 | -0.06 |
| rs11941492 | KRTCAP3   | 0.0097 | -0.06 |
| rs11133360 | SLC35A4   | 0.0037 | 0.06  |
| rs12535394 | SLC25A53  | 0.0051 | 0.06  |
| rs12535394 | ZNF362    | 0.0068 | 0.06  |

|            |          |        |       |
|------------|----------|--------|-------|
| rs11941492 | GNB1     | 0.0037 | 0.06  |
| rs12535394 | MRPL3    | 0.0047 | 0.06  |
| rs12535394 | GPR22    | 0.0125 | 0.06  |
| rs11133360 | PAN3     | 0.0114 | -0.06 |
| rs10275489 | LRRC34   | 0.0052 | -0.06 |
| rs12535394 | LRRC8B   | 0.0110 | 0.06  |
| rs11941492 | SMAP2    | 0.0068 | 0.06  |
| rs11941492 | PRKCQ    | 0.0034 | 0.06  |
| rs10275489 | CTR9     | 0.0024 | 0.06  |
| rs10275489 | C11ORF73 | 0.0088 | -0.06 |
| rs11941492 | ZNF197   | 0.0125 | -0.06 |
| rs12535394 | NFE2L3   | 0.0117 | 0.06  |
| rs12535394 | GAR1     | 0.0085 | 0.06  |
| rs10275489 | ACACA    | 0.0019 | -0.06 |
| rs11133360 | FCGR2C   | 0.0125 | -0.06 |
| rs12535394 | PLEKHG4B | 0.0091 | 0.06  |
| rs12535394 | PKNOX2   | 0.0055 | 0.06  |
| rs12535394 | ZSCAN16  | 0.0109 | 0.06  |
| rs11941492 | LZTFL1   | 0.0118 | -0.06 |
| rs11941492 | SUZ12P1  | 0.0104 | -0.06 |
| rs11941492 | COL19A1  | 0.0035 | 0.06  |
| rs12535394 | INSL6    | 0.0115 | 0.06  |
| rs11941492 | C4ORF3   | 0.0074 | 0.06  |
| rs10275489 | GAS2     | 0.0066 | 0.06  |
| rs12535394 | TMEM126B | 0.0036 | 0.06  |
| rs12535394 | SIX3     | 0.0071 | 0.06  |
| rs11941492 | TMPRSS11 | 0.0080 | 0.06  |
|            | A        |        |       |
| rs10275489 | SEPSECS  | 0.0121 | 0.06  |
| rs12535394 | ZNF124   | 0.0009 | 0.06  |
| rs11133360 | ZNF586   | 0.0108 | -0.06 |
| rs12535394 | PRR3     | 0.0092 | 0.06  |
| rs12535394 | CXCR2P1  | 0.0121 | 0.06  |
| rs12535394 | CAPN7    | 0.0062 | -0.06 |
| rs11941492 | TMEM155  | 0.0057 | 0.06  |
| rs12535394 | C7ORF13  | 0.0107 | 0.06  |
| rs12535394 | PAX9     | 0.0115 | 0.06  |
| rs11941492 | TSGA10IP | 0.0063 | 0.06  |
| rs12535394 | CENPW    | 0.0123 | 0.06  |
| rs12535394 | MAGOH    | 0.0080 | 0.06  |
| rs11941492 | ANKRD33  | 0.0049 | 0.06  |
| rs12535394 | PHF20    | 0.0049 | -0.06 |
| rs12535394 | ZC4H2    | 0.0056 | 0.06  |
| rs12535394 | UBE2D1   | 0.0100 | 0.06  |
| rs11941492 | KCNC1    | 0.0109 | 0.06  |
| rs12535394 | ZNF672   | 0.0053 | 0.06  |
| rs10275489 | TREML3P  | 0.0124 | 0.06  |
| rs10275489 | SIM2     | 0.0120 | -0.06 |
| rs10275489 | EXT2     | 0.0111 | -0.06 |
| rs12535394 | RBM8A    | 0.0015 | 0.06  |



|            |          |        |       |
|------------|----------|--------|-------|
| rs11941492 | TPPP2    | 0.0095 | -0.06 |
| rs12535394 | CREBBP   | 0.0099 | -0.06 |
| rs12535394 | PRMT5    | 0.0049 | 0.06  |
| rs11941492 | FAM228A  | 0.0085 | 0.06  |
| rs12535394 | GINS1    | 0.0111 | 0.06  |
| rs12535394 | KCNJ10   | 0.0052 | 0.06  |
| rs12535394 | SNORA5C  | 0.0044 | -0.06 |
| rs11941492 | KCNB1    | 0.0047 | 0.06  |
| rs12535394 | IDO1     | 0.0096 | 0.06  |
| rs10275489 | KRT20    | 0.0051 | 0.06  |
| rs10275489 | OMP      | 0.0114 | -0.06 |
| rs11133360 | PSMD8    | 0.0098 | 0.06  |
| rs10275489 | LZTS3    | 0.0108 | -0.06 |
| rs10275489 | ORM2     | 0.0089 | 0.06  |
| rs12535394 | HHAT     | 0.0112 | -0.06 |
| rs11941492 | DCK      | 0.0076 | 0.06  |
| rs11941492 | RTP2     | 0.0046 | 0.06  |
| rs11941492 | SENP6    | 0.0104 | -0.06 |
| rs10275489 | PRAME    | 0.0057 | -0.06 |
| rs12535394 | MRE11A   | 0.0126 | 0.06  |
| rs11941492 | C9ORF78  | 0.0065 | 0.06  |
| rs10275489 | CT83     | 0.0109 | -0.06 |
| rs12535394 | CEACAM22 | 0.0054 | 0.06  |
|            | P        |        |       |
| rs11941492 | NADK     | 0.0092 | 0.06  |
| rs12535394 | LMO4     | 0.0056 | 0.06  |
| rs12535394 | PFN2     | 0.0090 | 0.05  |
| rs11941492 | PMPCB    | 0.0038 | -0.05 |
| rs11133360 | BCCIP    | 0.0017 | 0.05  |
| rs11941492 | GLDC     | 0.0118 | 0.05  |
| rs12535394 | PSMA8    | 0.0123 | 0.05  |
| rs11941492 | ARHGDI3  | 0.0125 | 0.05  |
| rs10275489 | TXNDC16  | 0.0123 | 0.05  |
| rs12535394 | SYCP2L   | 0.0088 | 0.05  |
| rs11133360 | FAM32A   | 0.0054 | 0.05  |
| rs11941492 | GPR22    | 0.0060 | 0.05  |
| rs11941492 | ALG9     | 0.0097 | -0.05 |
| rs11941492 | ADIPOR2  | 0.0097 | 0.05  |
| rs12535394 | ANKRD45  | 0.0041 | 0.05  |
| rs10275489 | DDIAS    | 0.0045 | -0.05 |
| rs11941492 | ZNF391   | 0.0061 | -0.05 |
| rs12535394 | SHISA6   | 0.0094 | -0.05 |
| rs12535394 | RBM34    | 0.0008 | 0.05  |
| rs10275489 | NEO1     | 0.0084 | 0.05  |
| rs12535394 | CHD1L    | 0.0105 | 0.05  |
| rs10275489 | SHISA6   | 0.0024 | 0.05  |
| rs12535394 | 4-Sep    | 0.0098 | 0.05  |
| rs11941492 | DOPEY2   | 0.0066 | 0.05  |
| rs12535394 | KCNMB3   | 0.0072 | 0.05  |
| rs10275489 | NHLRC1   | 0.0098 | -0.05 |

|            |           |        |       |
|------------|-----------|--------|-------|
| rs10275489 | ZNF609    | 0.0119 | 0.05  |
| rs11941492 | LDOC1     | 0.0052 | 0.05  |
| rs12535394 | LINC00092 | 0.0014 | 0.05  |
| rs11941492 | MSI2      | 0.0052 | 0.05  |
| rs12535394 | APEX1     | 0.0004 | 0.05  |
| rs11941492 | PPP2R5A   | 0.0053 | -0.05 |
| rs10275489 | GMNN      | 0.0071 | -0.05 |
| rs11941492 | LURAP1L   | 0.0108 | 0.05  |
| rs11133360 | PIGM      | 0.0061 | 0.05  |
| rs12535394 | AGK       | 0.0113 | 0.05  |
| rs10275489 | CEP57     | 0.0124 | -0.05 |
| rs11941492 | SP9       | 0.0024 | 0.05  |
| rs11941492 | IQCE      | 0.0115 | -0.05 |
| rs11941492 | SMOC1     | 0.0091 | -0.05 |
| rs11133360 | GGCT      | 0.0119 | 0.05  |
| rs11941492 | GTF3C1    | 0.0046 | 0.05  |
| rs12535394 | DKC1      | 0.0102 | 0.05  |
| rs12535394 | ABRACL    | 0.0080 | 0.05  |
| rs11941492 | PATL2     | 0.0116 | 0.05  |
| rs12535394 | POLR3G    | 0.0057 | 0.05  |
| rs11941492 | TIMD4     | 0.0009 | 0.05  |
| rs12535394 | TTC13     | 0.0070 | 0.05  |
| rs11941492 | ATF6B     | 0.0113 | -0.05 |
| rs12535394 | RAD51AP2  | 0.0096 | 0.05  |
| rs11941492 | OR6F1     | 0.0031 | 0.05  |
| rs12535394 | RPP38     | 0.0006 | 0.05  |
| rs12535394 | UTP11L    | 0.0094 | 0.05  |
| rs11941492 | GORASP1   | 0.0101 | -0.05 |
| rs10275489 | DHCR7     | 0.0009 | -0.05 |
| rs11941492 | CDR1      | 0.0127 | 0.05  |
| rs12535394 | FAM78B    | 0.0100 | 0.05  |
| rs12535394 | DCLRE1C   | 0.0102 | 0.05  |
| rs12535394 | NRL       | 0.0034 | 0.05  |
| rs12535394 | CSTF3     | 0.0100 | 0.05  |
| rs11941492 | NUP43     | 0.0031 | -0.05 |
| rs12535394 | OR52N2    | 0.0019 | 0.05  |
| rs10275489 | PPIL1     | 0.0120 | -0.05 |
| rs12535394 | POLR3F    | 0.0099 | 0.05  |
| rs11133360 | TMEM99    | 0.0118 | 0.05  |
| rs10275489 | LRR1      | 0.0091 | -0.05 |
| rs12535394 | BCL11A    | 0.0085 | 0.05  |
| rs10275489 | MPP6      | 0.0087 | -0.05 |
| rs11941492 | SARS      | 0.0070 | 0.05  |
| rs10275489 | ABT1      | 0.0101 | -0.05 |
| rs12535394 | ATP5C1    | 0.0054 | 0.05  |
| rs10275489 | APOA1BP   | 0.0105 | -0.05 |
| rs11941492 | ARHGAP5   | 0.0066 | -0.05 |
| rs10275489 | PQLC2L    | 0.0107 | -0.05 |
| rs12535394 | GEMIN2    | 0.0071 | 0.05  |

|            |          |        |       |
|------------|----------|--------|-------|
| rs10275489 | FNBP1L   | 0.0119 | 0.05  |
| rs11941492 | LAMP1    | 0.0048 | -0.05 |
| rs12535394 | ZIC1     | 0.0108 | 0.05  |
| rs12535394 | MTPAP    | 0.0095 | 0.05  |
| rs12535394 | SLFNL1   | 0.0069 | 0.05  |
| rs11941492 | GPR182   | 0.0055 | 0.05  |
| rs11941492 | CUL4A    | 0.0032 | -0.05 |
| rs12535394 | FAM171A1 | 0.0014 | 0.05  |
| rs12535394 | GMPS     | 0.0109 | 0.05  |
| rs12535394 | SCNM1    | 0.0063 | 0.05  |
| rs12535394 | VANGL2   | 0.0057 | 0.05  |
| rs10275489 | ZNF720   | 0.0063 | 0.05  |
| rs11133360 | WDR53    | 0.0085 | 0.05  |
| rs11941492 | STXBP4   | 0.0010 | 0.05  |
| rs12535394 | DHCR7    | 0.0101 | 0.05  |
| rs11941492 | KIAA1045 | 0.0106 | 0.05  |
| rs10275489 | SUPT20H  | 0.0019 | 0.04  |
| rs12535394 | NFYC     | 0.0074 | 0.04  |
| rs11941492 | TPR      | 0.0061 | -0.04 |
| rs11941492 | MARS     | 0.0118 | 0.04  |
| rs12535394 | RIOK1    | 0.0052 | 0.04  |
| rs12535394 | VAX1     | 0.0113 | 0.04  |
| rs12535394 | RGS7BP   | 0.0016 | 0.04  |
| rs11941492 | ADRA1D   | 0.0019 | 0.04  |
| rs10275489 | GOT1L1   | 0.0118 | 0.04  |
| rs12535394 | GDI2     | 0.0040 | 0.04  |
| rs10275489 | TMEM199  | 0.0001 | 0.04  |
| rs10275489 | PTGER2   | 0.0105 | 0.04  |
| rs12535394 | HEATR1   | 0.0072 | 0.04  |
| rs10275489 | TADA2A   | 0.0078 | -0.04 |
| rs11133360 | TRAF3IP2 | 0.0044 | 0.04  |
| rs10275489 | PTCHD3P1 | 0.0097 | -0.04 |
| rs10275489 | PFKFB2   | 0.0059 | -0.04 |
| rs12535394 | KCNK5    | 0.0095 | 0.04  |
| rs10275489 | LELP1    | 0.0059 | 0.04  |
| rs10275489 | PSME3    | 0.0083 | -0.04 |
| rs11941492 | OR2T27   | 0.0065 | 0.04  |
| rs11941492 | ENAH     | 0.0090 | -0.04 |
| rs12535394 | MRPL9    | 0.0043 | 0.04  |
| rs12535394 | SOX30    | 0.0061 | 0.04  |
| rs12535394 | LTV1     | 0.0121 | 0.04  |
| rs12535394 | ANP32E   | 0.0028 | 0.04  |
| rs10275489 | VANGL2   | 0.0078 | -0.04 |
| rs12535394 | C8ORF86  | 0.0018 | -0.04 |
| rs12535394 | TSPYL5   | 0.0066 | 0.04  |
| rs10275489 | CCNY     | 0.0106 | -0.04 |
| rs11941492 | DRD1     | 0.0113 | 0.04  |
| rs11941492 | CHTOP    | 0.0121 | -0.04 |
| rs12535394 | ACBD7    | 0.0031 | 0.04  |

|            |           |        |       |
|------------|-----------|--------|-------|
| rs12535394 | CTPS1     | 0.0124 | 0.04  |
| rs12535394 | ZFP42     | 0.0037 | 0.04  |
| rs12535394 | HSPA14    | 0.0121 | 0.04  |
| rs11941492 | SS18      | 0.0059 | -0.04 |
| rs12535394 | SUV39H2   | 0.0103 | 0.04  |
| rs12535394 | ADO       | 0.0036 | 0.04  |
| rs10275489 | FAM171A1  | 0.0051 | -0.03 |
| rs10275489 | KCNK5     | 0.0112 | -0.03 |
| rs10275489 | HSPA14    | 0.0054 | -0.03 |
| rs11941492 | SDCCAG8   | 0.0078 | -0.03 |
| rs10275489 | GDF6      | 0.0037 | 0.03  |
| rs12535394 | SLCO5A1   | 0.0058 | 0.03  |
| rs11941492 | PSTK      | 0.0062 | 0.03  |
| rs11941492 | GDAP1L1   | 0.0089 | 0.03  |
| rs11941492 | BUB3      | 0.0126 | 0.03  |
| rs11941492 | CAV3      | 0.0041 | 0.03  |
| rs10275489 | SUV39H2   | 0.0121 | -0.03 |
| rs10275489 | C8ORF86   | 0.0041 | 0.03  |
| rs11133360 | SKA2      | 0.0107 | 0.03  |
| rs11941492 | INPP5F    | 0.0072 | 0.03  |
| rs10275489 | SUPT6H    | 0.0064 | 0.03  |
| rs10275489 | CALCOCO2  | 0.0117 | 0.03  |
| rs11941492 | RHAG      | 0.0065 | 0.03  |
| rs10275489 | VTN       | 0.0113 | 0.03  |
| rs11941492 | TOM1L1    | 0.0112 | 0.03  |
| rs11941492 | BARHL1    | 0.0049 | 0.03  |
| rs10275489 | ABCC3     | 0.0101 | 0.02  |
| rs10275489 | FGFR1     | 0.0087 | 0.02  |
| rs11941492 | SRL       | 0.0098 | 0.02  |
| rs11941492 | DYNAP     | 0.0010 | 0.02  |
| rs10275489 | OPCML     | 0.0025 | 0.02  |
| rs11941492 | PAGE4     | 0.0080 | 0.02  |
| rs11941492 | NT5C1B    | 0.0025 | 0.02  |
| rs11941492 | FMR1NB    | 0.0092 | 0.02  |
| rs11133360 | MED24     | 0.0051 | 0.02  |
| rs11941492 | CLEC4M    | 0.0079 | 0.02  |
| rs10275489 | COLEC10   | 0.0100 | 0.01  |
| rs11941492 | CD5L      | 0.0116 | 0.01  |
| rs10275489 | PNMT      | 0.0047 | 0.01  |
| rs11941492 | GRK1      | 0.0029 | 0.01  |
| rs11133360 | STARD3    | 0.0079 | 0.01  |
| rs10275489 | PROSC     | 0.0118 | 0.01  |
| rs11941492 | VWC2L     | 0.0065 | 0.01  |
| rs10275489 | PSMD3     | 0.0030 | 0.01  |
| rs10275489 | BMP10     | 0.0103 | 0.01  |
| rs11941492 | CUZD1     | 0.0089 | 0.01  |
| rs11941492 | GUCA2A    | 0.0040 | 0.01  |
| rs11941492 | LINC00671 | 0.0066 | 0.01  |
| rs11941492 | NOBOX     | 0.0087 | 0.01  |

|            |       |        |      |
|------------|-------|--------|------|
| rs10275489 | APOC4 | 0.0113 | 0.01 |
| rs11941492 | RGAG1 | 0.0067 | 0.00 |

---

Table SV. Statistical P-values obtained from ANOVA and LSD post hoc test for Fig. 7.

| <b>Joint expression of <i>ANLN</i> and <i>KDR</i></b> |           |                 |                 |                 |
|-------------------------------------------------------|-----------|-----------------|-----------------|-----------------|
| <i>ADA</i>                                            | high_high | high_low        | low_high        | low_low         |
| high_high                                             | NA        | 0.97            | <b>0.01</b>     | 0.08            |
| high_low                                              | NA        | NA              | <b>6.40E-03</b> | <b>0.05</b>     |
| low_high                                              | NA        | NA              | NA              | 0.53            |
| low_low                                               | NA        | NA              | NA              | NA              |
| <i>IL2RG</i>                                          | high_high | high_low        | low_high        | low_low         |
| high_high                                             | NA        | <b>0.03</b>     | 0.11            | <b>3.34E-03</b> |
| high_low                                              | NA        | NA              | 0.54            | 0.3             |
| low_high                                              | NA        | NA              | NA              | 0.11            |
| low_low                                               | NA        | NA              | NA              | NA              |
| <i>DCLRE1C</i>                                        | high_high | high_low        | low_high        | low_low         |
| high_high                                             | NA        | 0.09            | <b>5.73E-07</b> | <b>1.17E-07</b> |
| high_low                                              | NA        | NA              | <b>2.93E-13</b> | <b>9.95E-14</b> |
| low_high                                              | NA        | NA              | NA              | 0.5278          |
| low_low                                               | NA        | NA              | NA              | NA              |
| <i>ORAI1</i>                                          | high_high | high_low        | low_high        | low_low         |
| high_high                                             | NA        | <b>0.04</b>     | <b>0.05</b>     | <b>2.61E-03</b> |
| high_low                                              | NA        | NA              | <b>7.28E-06</b> | 0.23            |
| low_high                                              | NA        | NA              | NA              | <b>1.16E-07</b> |
| low_low                                               | NA        | NA              | NA              | NA              |
| <i>AIRE</i>                                           | high_high | high_low        | low_high        | low_low         |
| high_high                                             | NA        | 0.68            | 0.18            | 0.06            |
| high_low                                              | NA        | NA              | 0.3             | 0.1             |
| low_high                                              | NA        | NA              | NA              | 0.5             |
| low_low                                               | NA        | NA              | NA              | NA              |
| <i>ZAP70</i>                                          | high_high | high_low        | low_high        | low_low         |
| high_high                                             | NA        | 0.19            | 0.82            | 0.87            |
| high_low                                              | NA        | NA              | 0.23            | 0.24            |
| low_high                                              | NA        | NA              | NA              | 0.95            |
| low_low                                               | NA        | NA              | NA              | NA              |
| <i>RFXANK</i>                                         | high_high | high_low        | low_high        | low_low         |
| high_high                                             | NA        | <b>2.59E-03</b> | 0.68            | <b>&lt;0.01</b> |
| high_low                                              | NA        | NA              | <b>3.56E-03</b> | <b>6.42E-13</b> |
| low_high                                              | NA        | NA              | NA              | <b>&lt;0.01</b> |
| low_low                                               | NA        | NA              | NA              | NA              |
| <i>TNFRSF13C</i>                                      | high_high | high_low        | low_high        | low_low         |
| high_high                                             | NA        | 0.7             | 0.03            | 0.08            |
| high_low                                              | NA        | NA              | <b>3.23E-03</b> | <b>0.02</b>     |
| low_high                                              | NA        | NA              | NA              | 0.7             |
| low_low                                               | NA        | NA              | NA              | NA              |
| <i>CD19</i>                                           | high_high | high_low        | low_high        | low_low         |
| high_high                                             | NA        | 0.12            | 0.21            | 0.2             |

|          |    |    |             |             |
|----------|----|----|-------------|-------------|
| high_low | NA | NA | <b>0.75</b> | <b>0.83</b> |
| low_high | NA | NA | NA          | <b>0.94</b> |
| low_low  | NA | NA | NA          | NA          |

---

Significant P-values are highlighted in bold. 'high\_high' represents a high expression of *ANLN* and a high expression of *KDR*, the same annotation scheme applies for the other combinations. *ANLN*, anillin actin-binding protein; *KDR*, kinase insert domain receptor; NA, not applicable.

Table SVI. Statistical P-values obtained from ANOVA and LSD post hoc test for Fig. 9.

| Gene                          | <i>ANLN</i> |           | Control           | <i>KDR</i>      |                 |
|-------------------------------|-------------|-----------|-------------------|-----------------|-----------------|
| <i>ANLN</i> in SUM149PT cells | ANLN_d      | ANLN_u    | Con_ ANLN         | KDR_d           | KDR_u           |
| ANLN_d                        | NA          | 2.71E-10  | 2.55E-04          | 9.73E-01        | 4.78E-09        |
| ANLN_u                        | NA          | NA        | 3.71E-09          | 2.22E-10        | 1.29E-04        |
| Con_ ANLN                     | NA          | NA        | NA                | <b>1.25E-04</b> | <b>1.82E-07</b> |
| KDR_d                         | NA          | NA        | NA                | NA              | 3.67E-09        |
| KDR_u                         | NA          | NA        | NA                | NA              | NA              |
| <i>KDR</i> in SUM149PT cells  | ANLN_d      | ANLN_u    | Con_ KDR          | KDR_d           | KDR_u           |
| ANLN_d                        | NA          | 1.57E-07  | <b>1.47E-02</b>   | 6.59E-01        | 4.11E-07        |
| ANLN_u                        | NA          | NA        | <b>2.74E-06</b>   | 6.94E-08        | 6.01E-01        |
| Con_ KDR                      | NA          | NA        | NA                | 1.90E-03        | 9.77E-06        |
| KDR_d                         | NA          | NA        | NA                | NA              | 1.68E-07        |
| KDR_u                         | NA          | NA        | NA                | NA              | NA              |
| <i>ANLN</i> in MCF10A cells   | ANLN_d      | ANLN_u    | Con_ ANLN         | KDR_d           | KDR_u           |
| ANLN_d                        | NA          | 8.41E-07  | 4.52E-03          | 5.21E-10        | 3.09E-01        |
| ANLN_u                        | NA          | NA        | 5.76E-05          | 2.50E-07        | 2.08E-07        |
| Con_ ANLN                     | NA          | NA        | NA                | <b>3.36E-09</b> | <b>2.82E-04</b> |
| KDR_d                         | NA          | NA        | NA                | NA              | 2.58E-10        |
| KDR_u                         | NA          | NA        | NA                | NA              | NA              |
| <i>KDR</i> in MCF10A cells    | ANLN_d      | ANLN_u    | Con_ KDR          | KDR_d           | KDR_u           |
| ANLN_d                        | NA          | 0.9434645 | <b>0.08980302</b> | 0.00011269      | 3.89E-05        |
|                               |             |           |                   | 7               |                 |
| ANLN_u                        | NA          | NA        | <b>0.27142978</b> | 0.00026933      | 1.85E-05        |
|                               |             |           |                   | 5               |                 |
| Con_ KDR                      | NA          | NA        | NA                | 0.00491346      | 2.75E-06        |
|                               |             |           |                   | 4               |                 |
| KDR_d                         | NA          | NA        | NA                | NA              | 1.02E-07        |
| KDR_u                         | NA          | NA        | NA                | NA              | NA              |

Relevant P-values shown in the manuscript are highlighted in bold. ‘ANLN\_d’ and ‘ANLN\_u’ represent downregulated and upregulated expression of *ANLN*, respectively, ‘KDR\_d’ and ‘KDR\_u’ represent downregulation and upregulation of



*KDR*, and 'Con\_ANLN' and 'Con\_KDR' are the controls of *ANLN* and *KDR*. *ANLN*, anillin actin-binding protein; *KDR*, kinase insert domain receptor; NA, not applicable.
